# Supplementary material
Source: Research Square preprint supplement (doi:10.21203/rs.3.rs-9660011/v1)
Supplement: Supplementary file 1 [file 9e789398913aa4295688a7db.doc]

Multimodal AIE-mediated heat-responsive gas biomimetic controlled-release platform for mild photothermal real-time diagnosis and therapy

*Yuling Chen1, Yiwen Zhao1, Lantian Tang1, Liwei Zhu1, Xiaoping Li1, Xianwei Luo1, Wentian Zhang1, Zhaoyang Yu,2 Fenghua Liu,2* Ben Zhong Tang,3* Ying Li1**

1Innovation Research Center for AIE Pharmaceutical Biology, Guangzhou Municipal and Guangdong Provincial Key Laboratory of Molecular Target & Clinical Pharmacology, the NMPA and State Key Laboratory of Respiratory Disease, School of Pharmaceutical Sciences, Guangzhou Medical University, Guangzhou, Guangdong, 511436, China

2Reproductive Medical Center, Guangdong Women and Children Hospital, Guangzhou, Guangdong, 510300, China.

3Guangdong Basic Research Center of Excellence for Aggregate Science, School of Science and Engineering, The Chinese University of Hong Kong (Shenzhen), Longgang, Shenzhen, Guangdong 518172, China

*Corresponding Author

Email: [lfh00825@163.com](mailto:lfh00825@163.com)

Email: [tangbenz@cuhk.edu.cn](mailto:tangbenz@cuhk.edu.cn)

Email: [liying@gzhmu.edu.cn](mailto:liying@gzhmu.edu.cn)

**Supporting Information**

**1**

**2**

**3**

**5**

**Figure S1**. Synthetic route to compound 5 (Py).

**Figure S2**. 1H NMR spectrum of compound 3 in CDCl3. The solvent peak was marked with asterisk.

**Figure S3**. 1H NMR spectrum of 5 in CDCl3. The solvent peak was marked with asterisk.


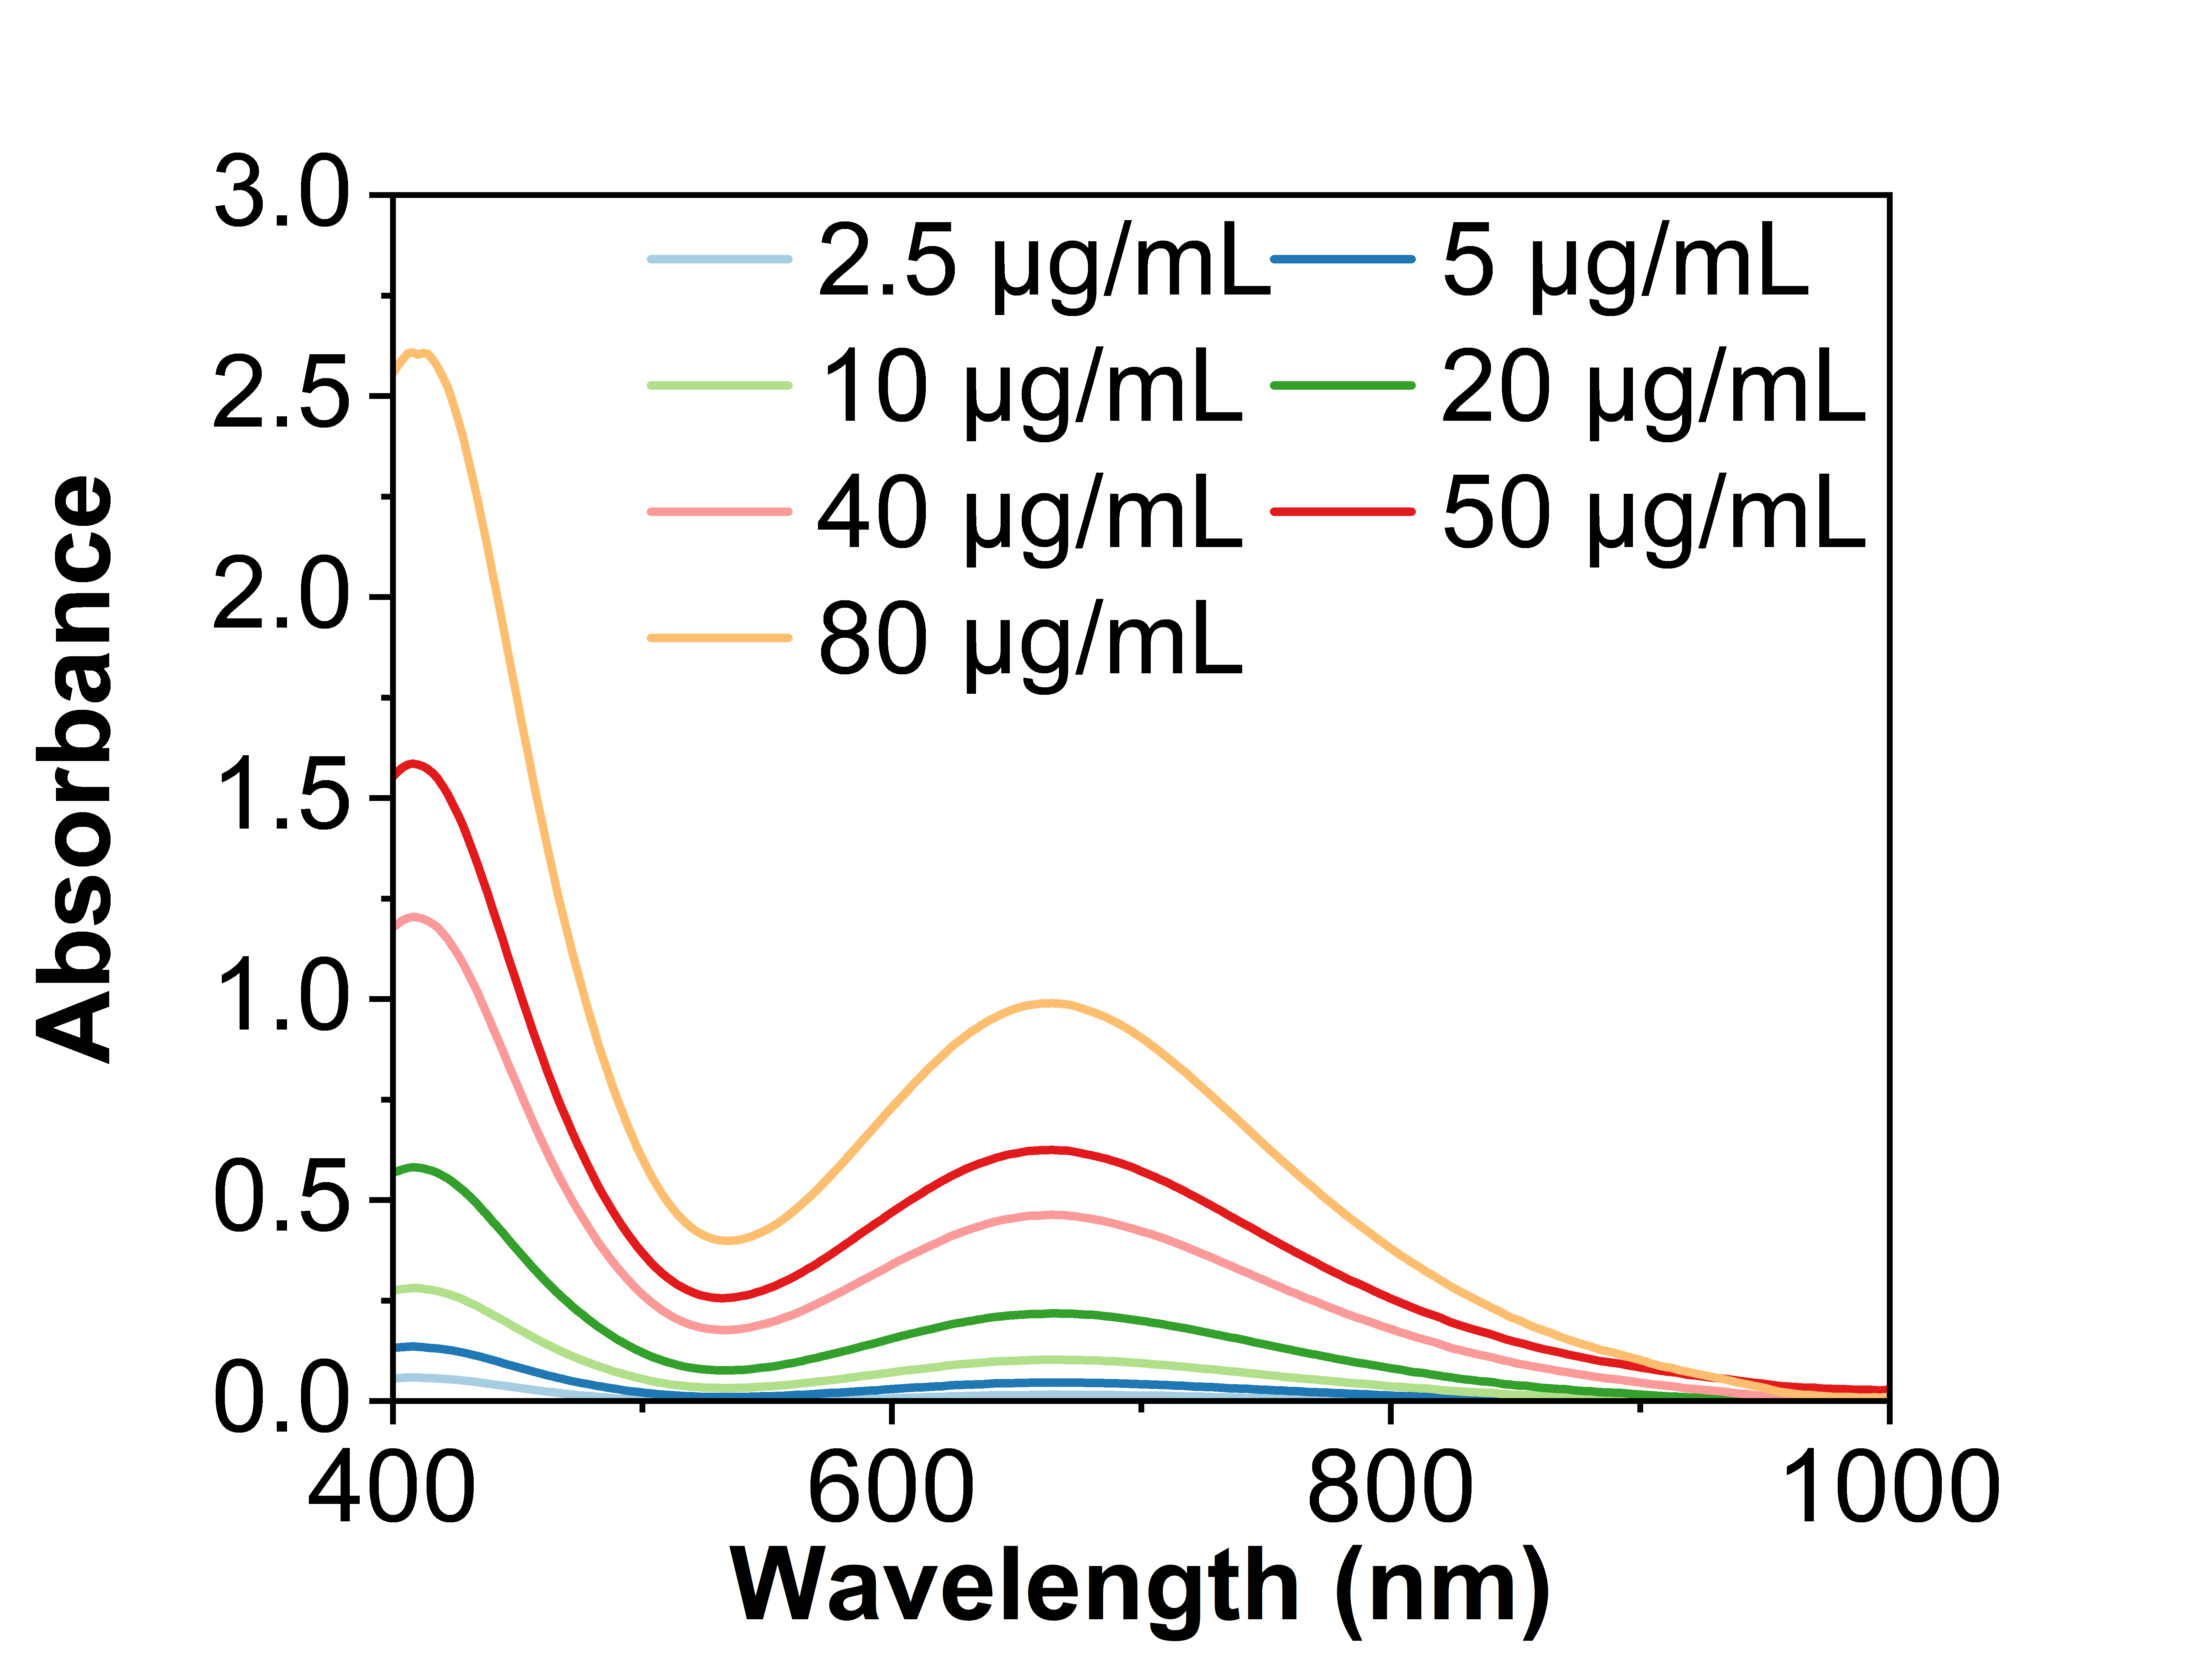


**Figure S4**. Absorption spectrum curve of Py characterized by UV-Vis.


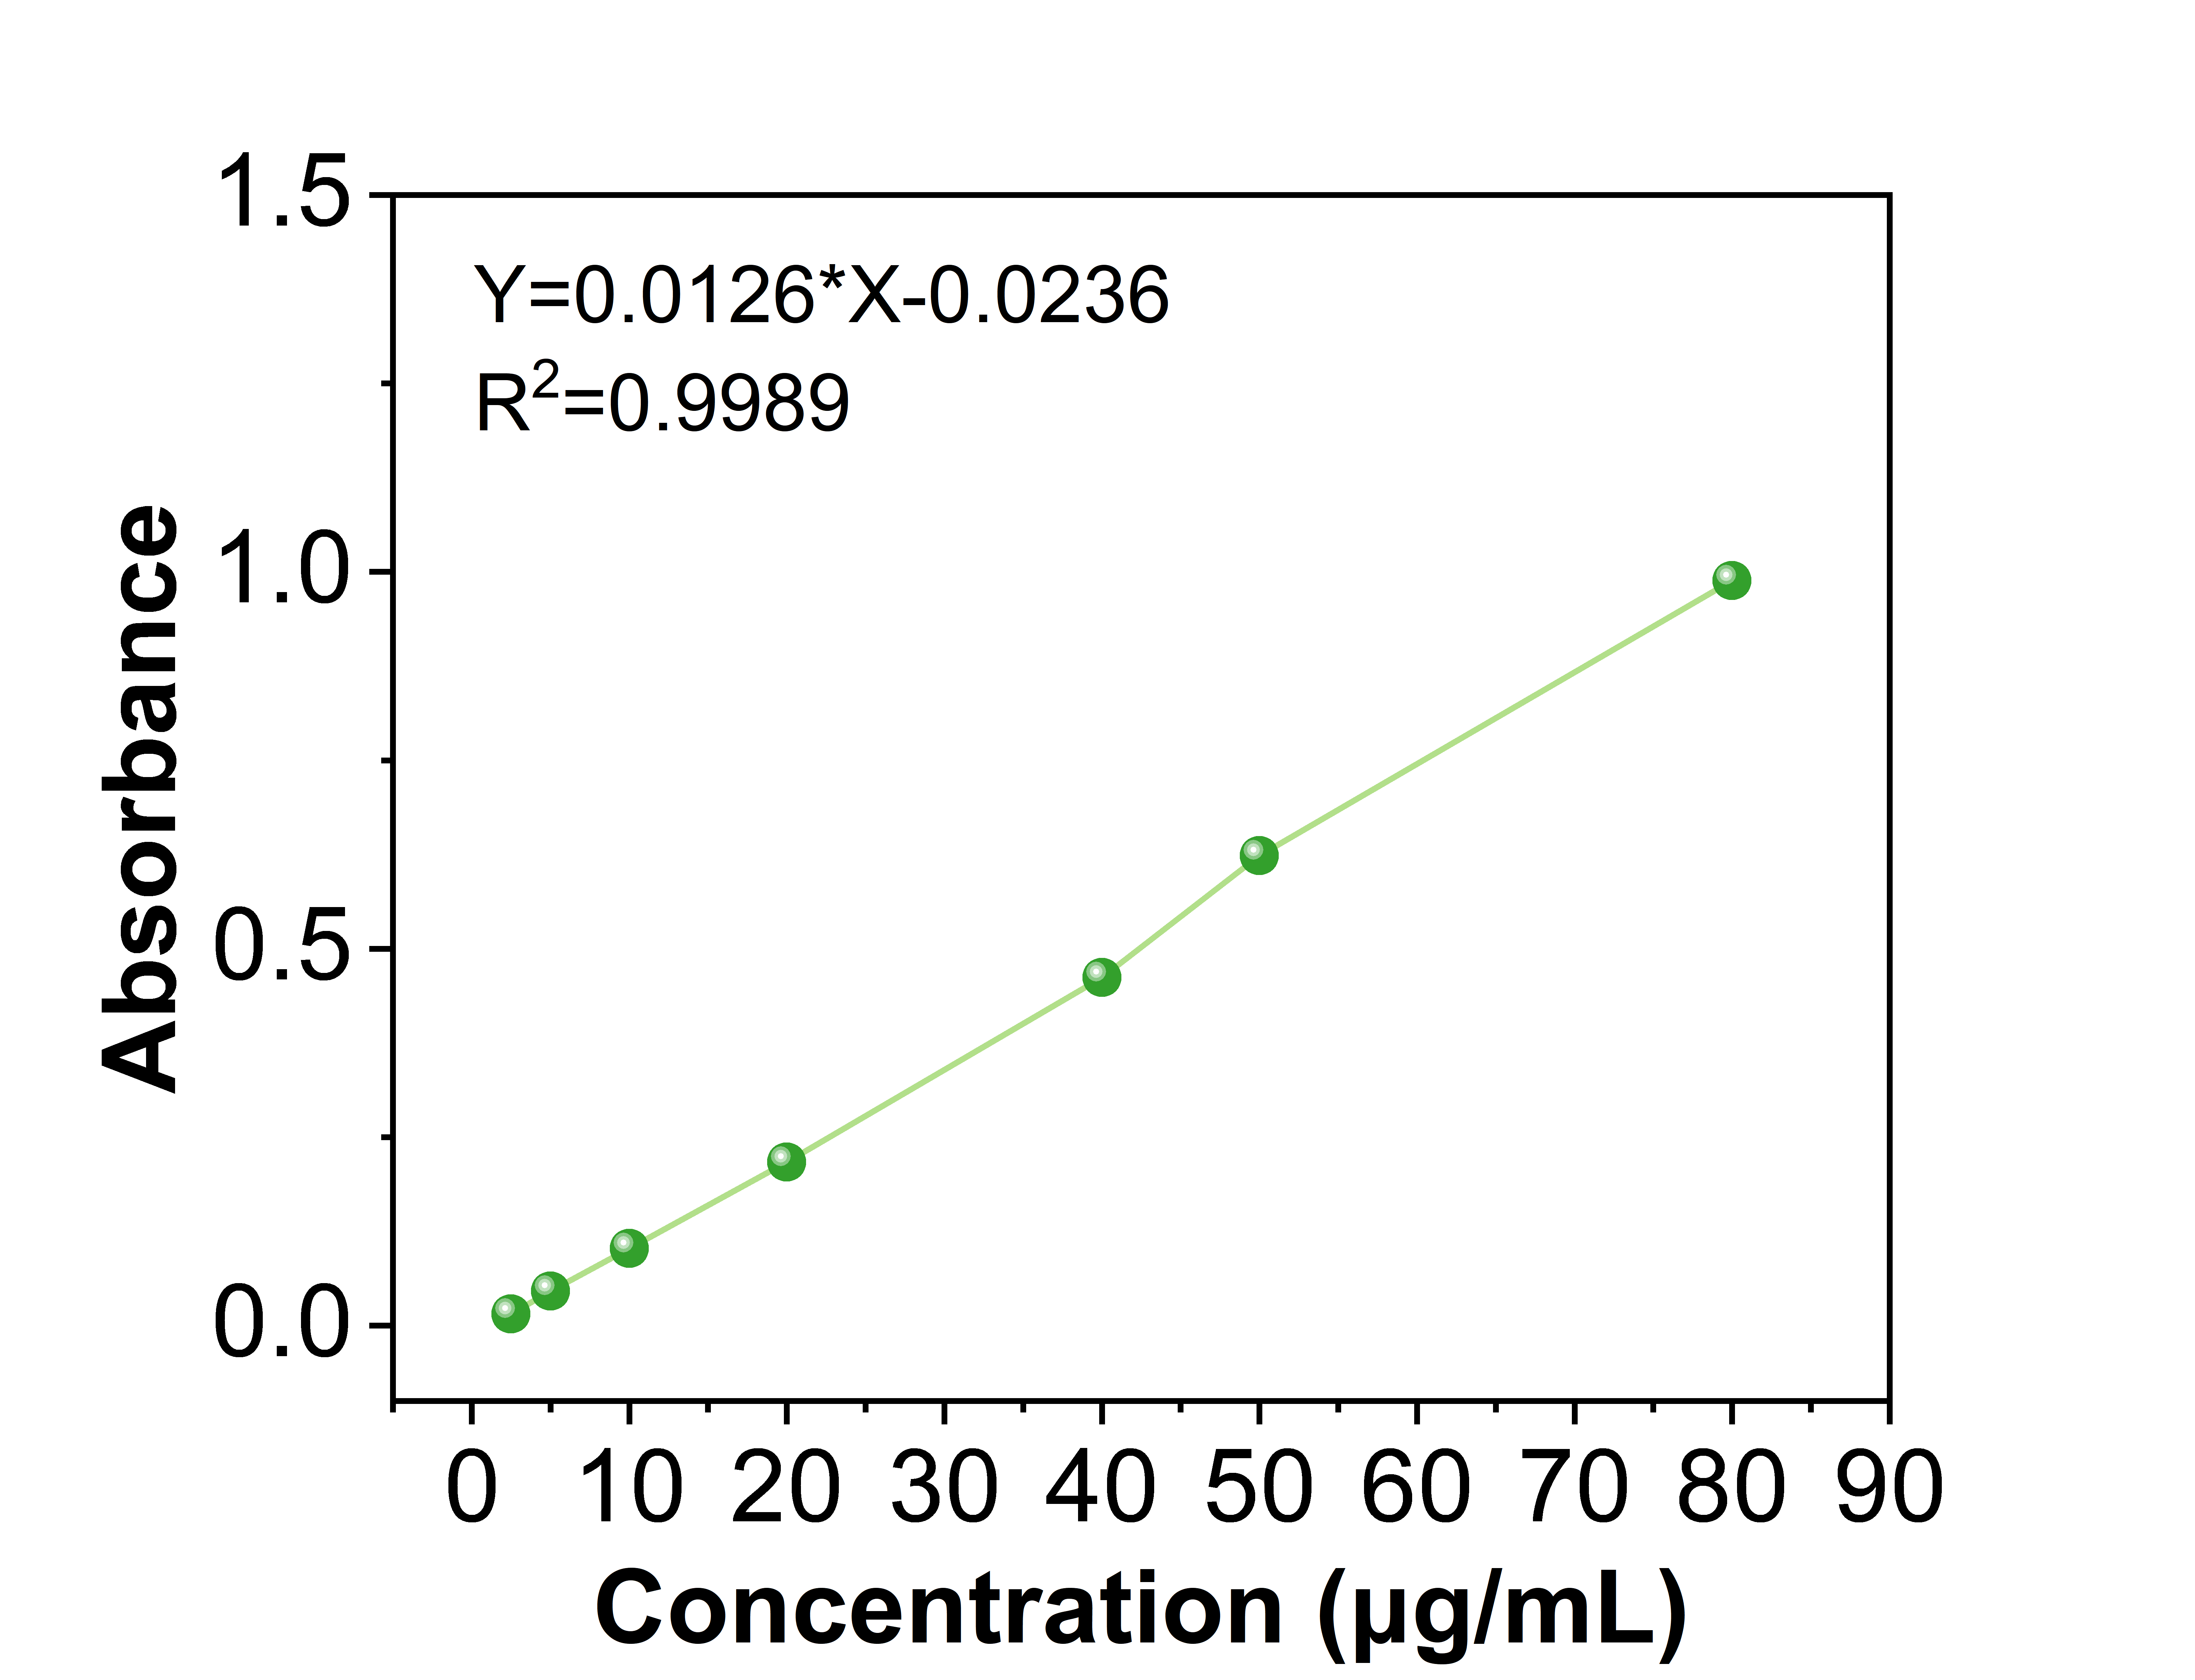


**Figure S5**. UV-Vis absorption standard curve of Py.


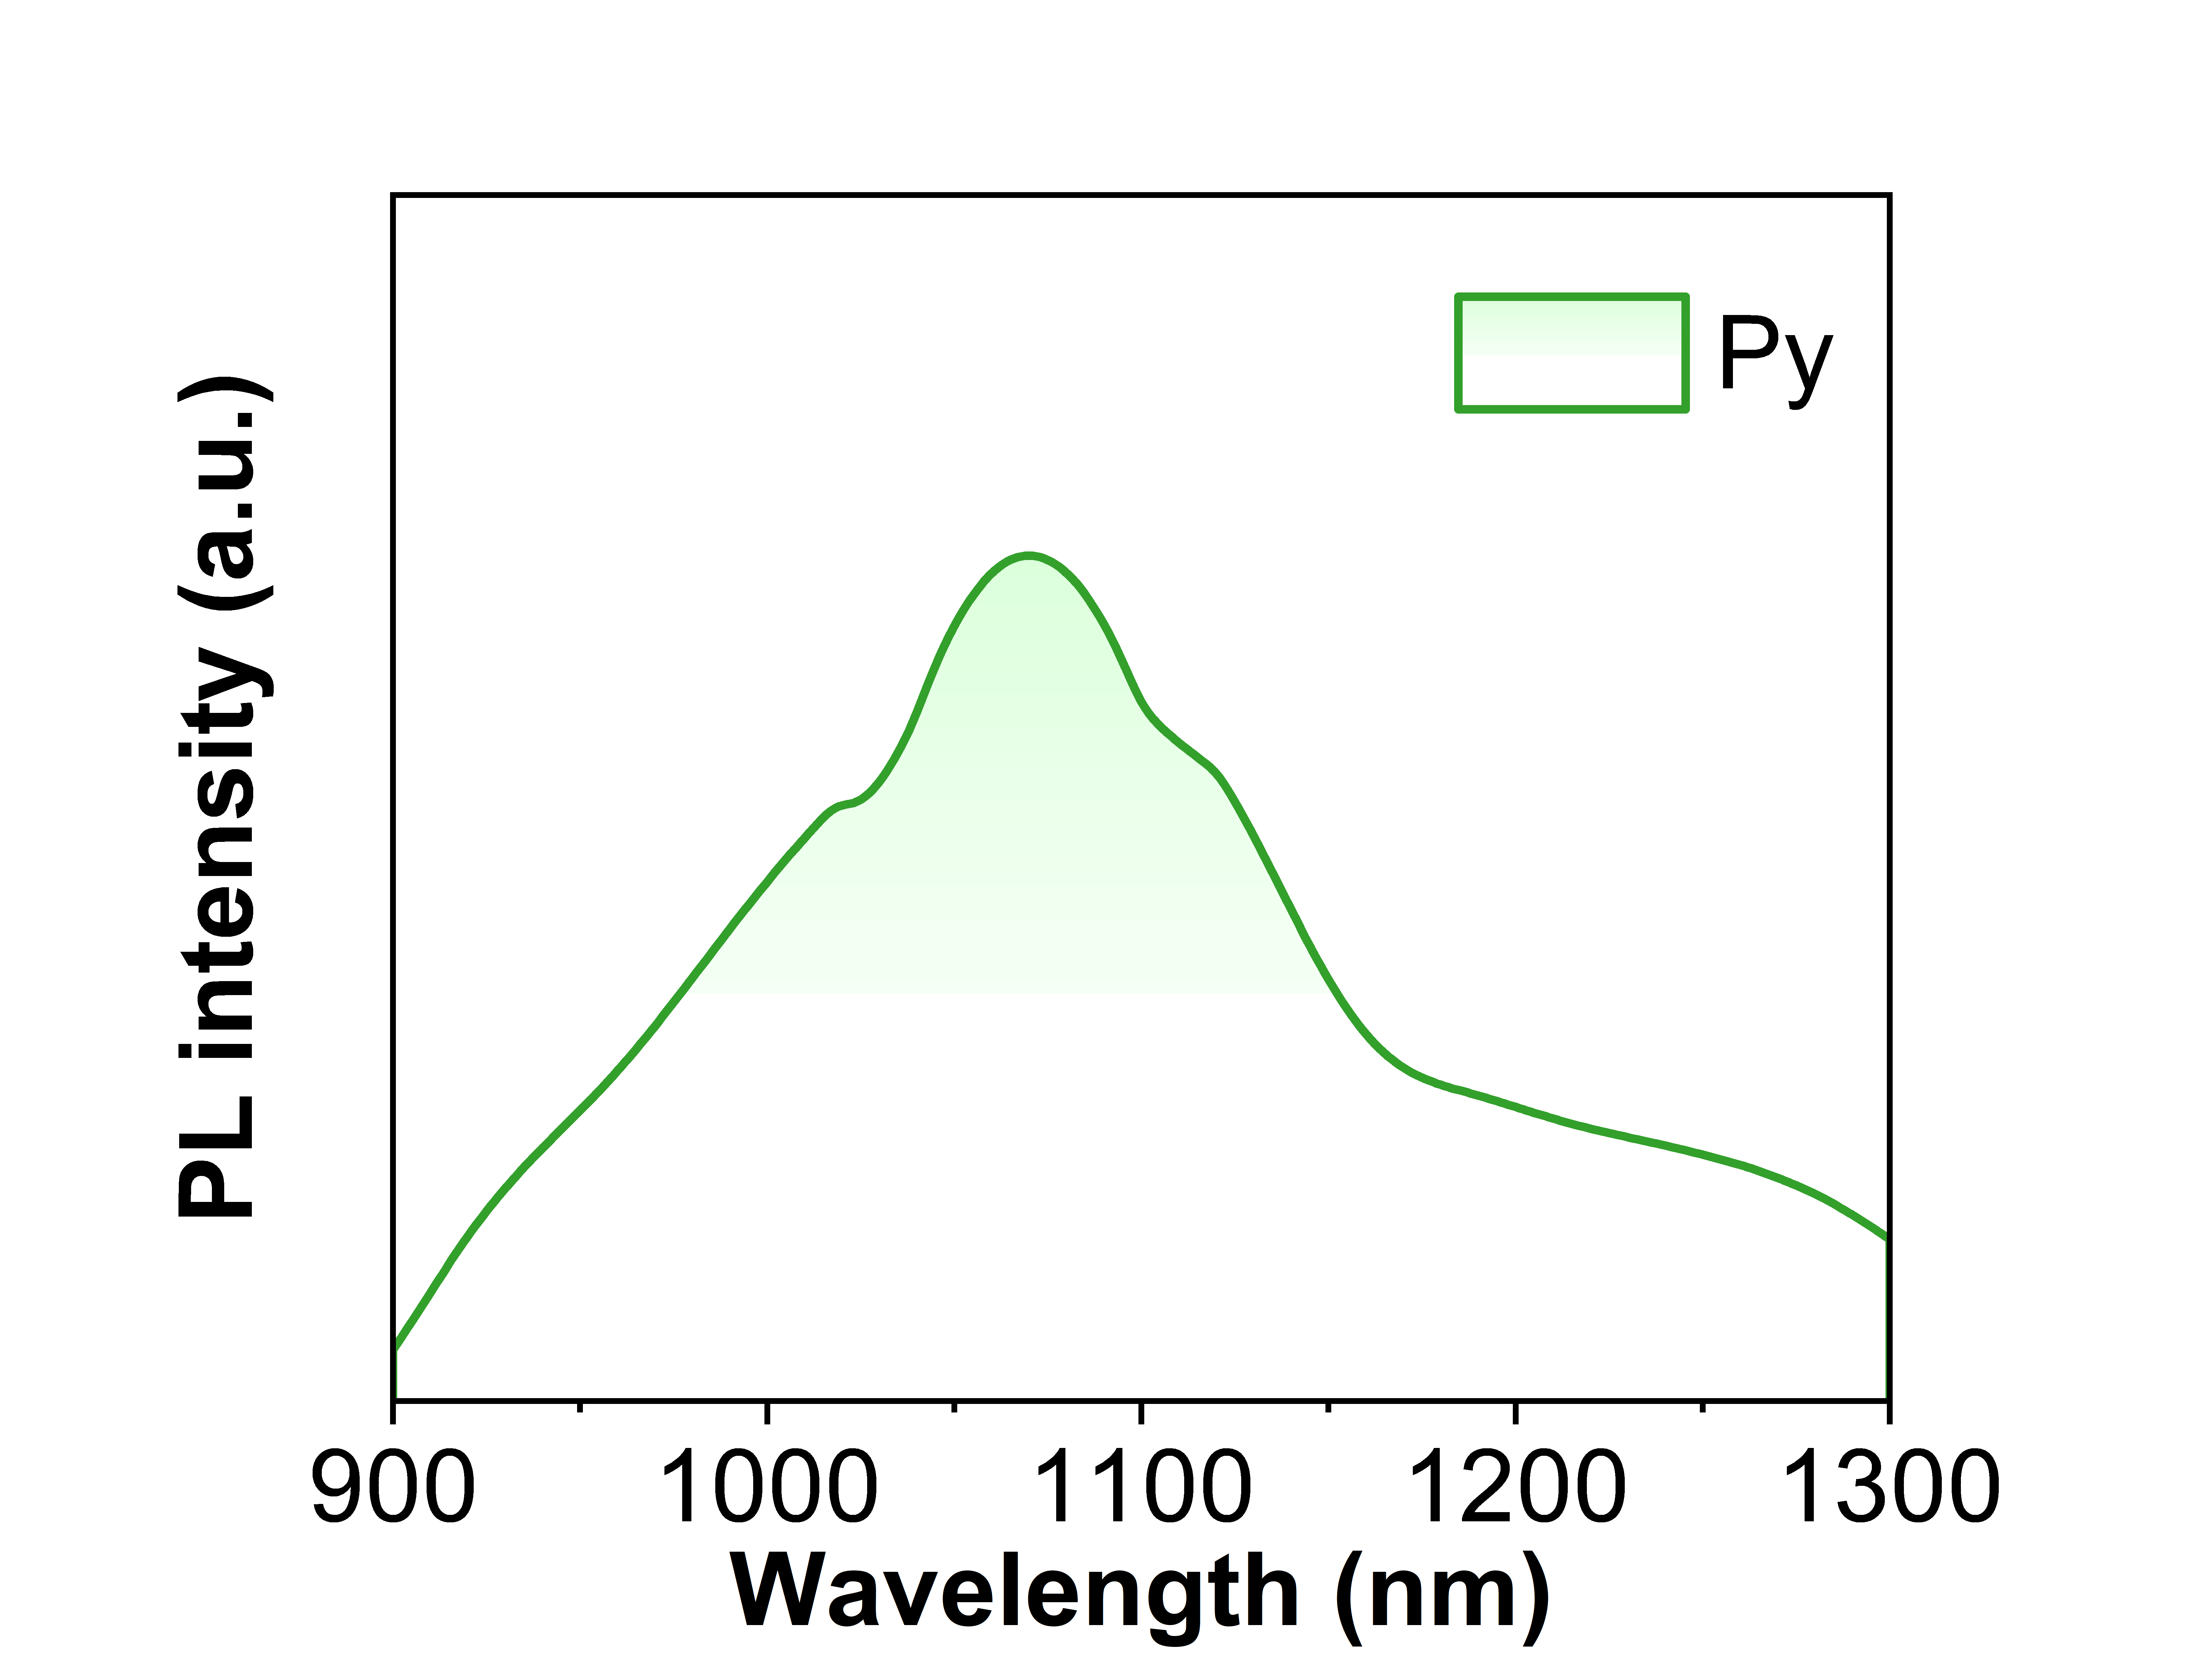


**Figure S6**. Fluorescence emission curve of Py.


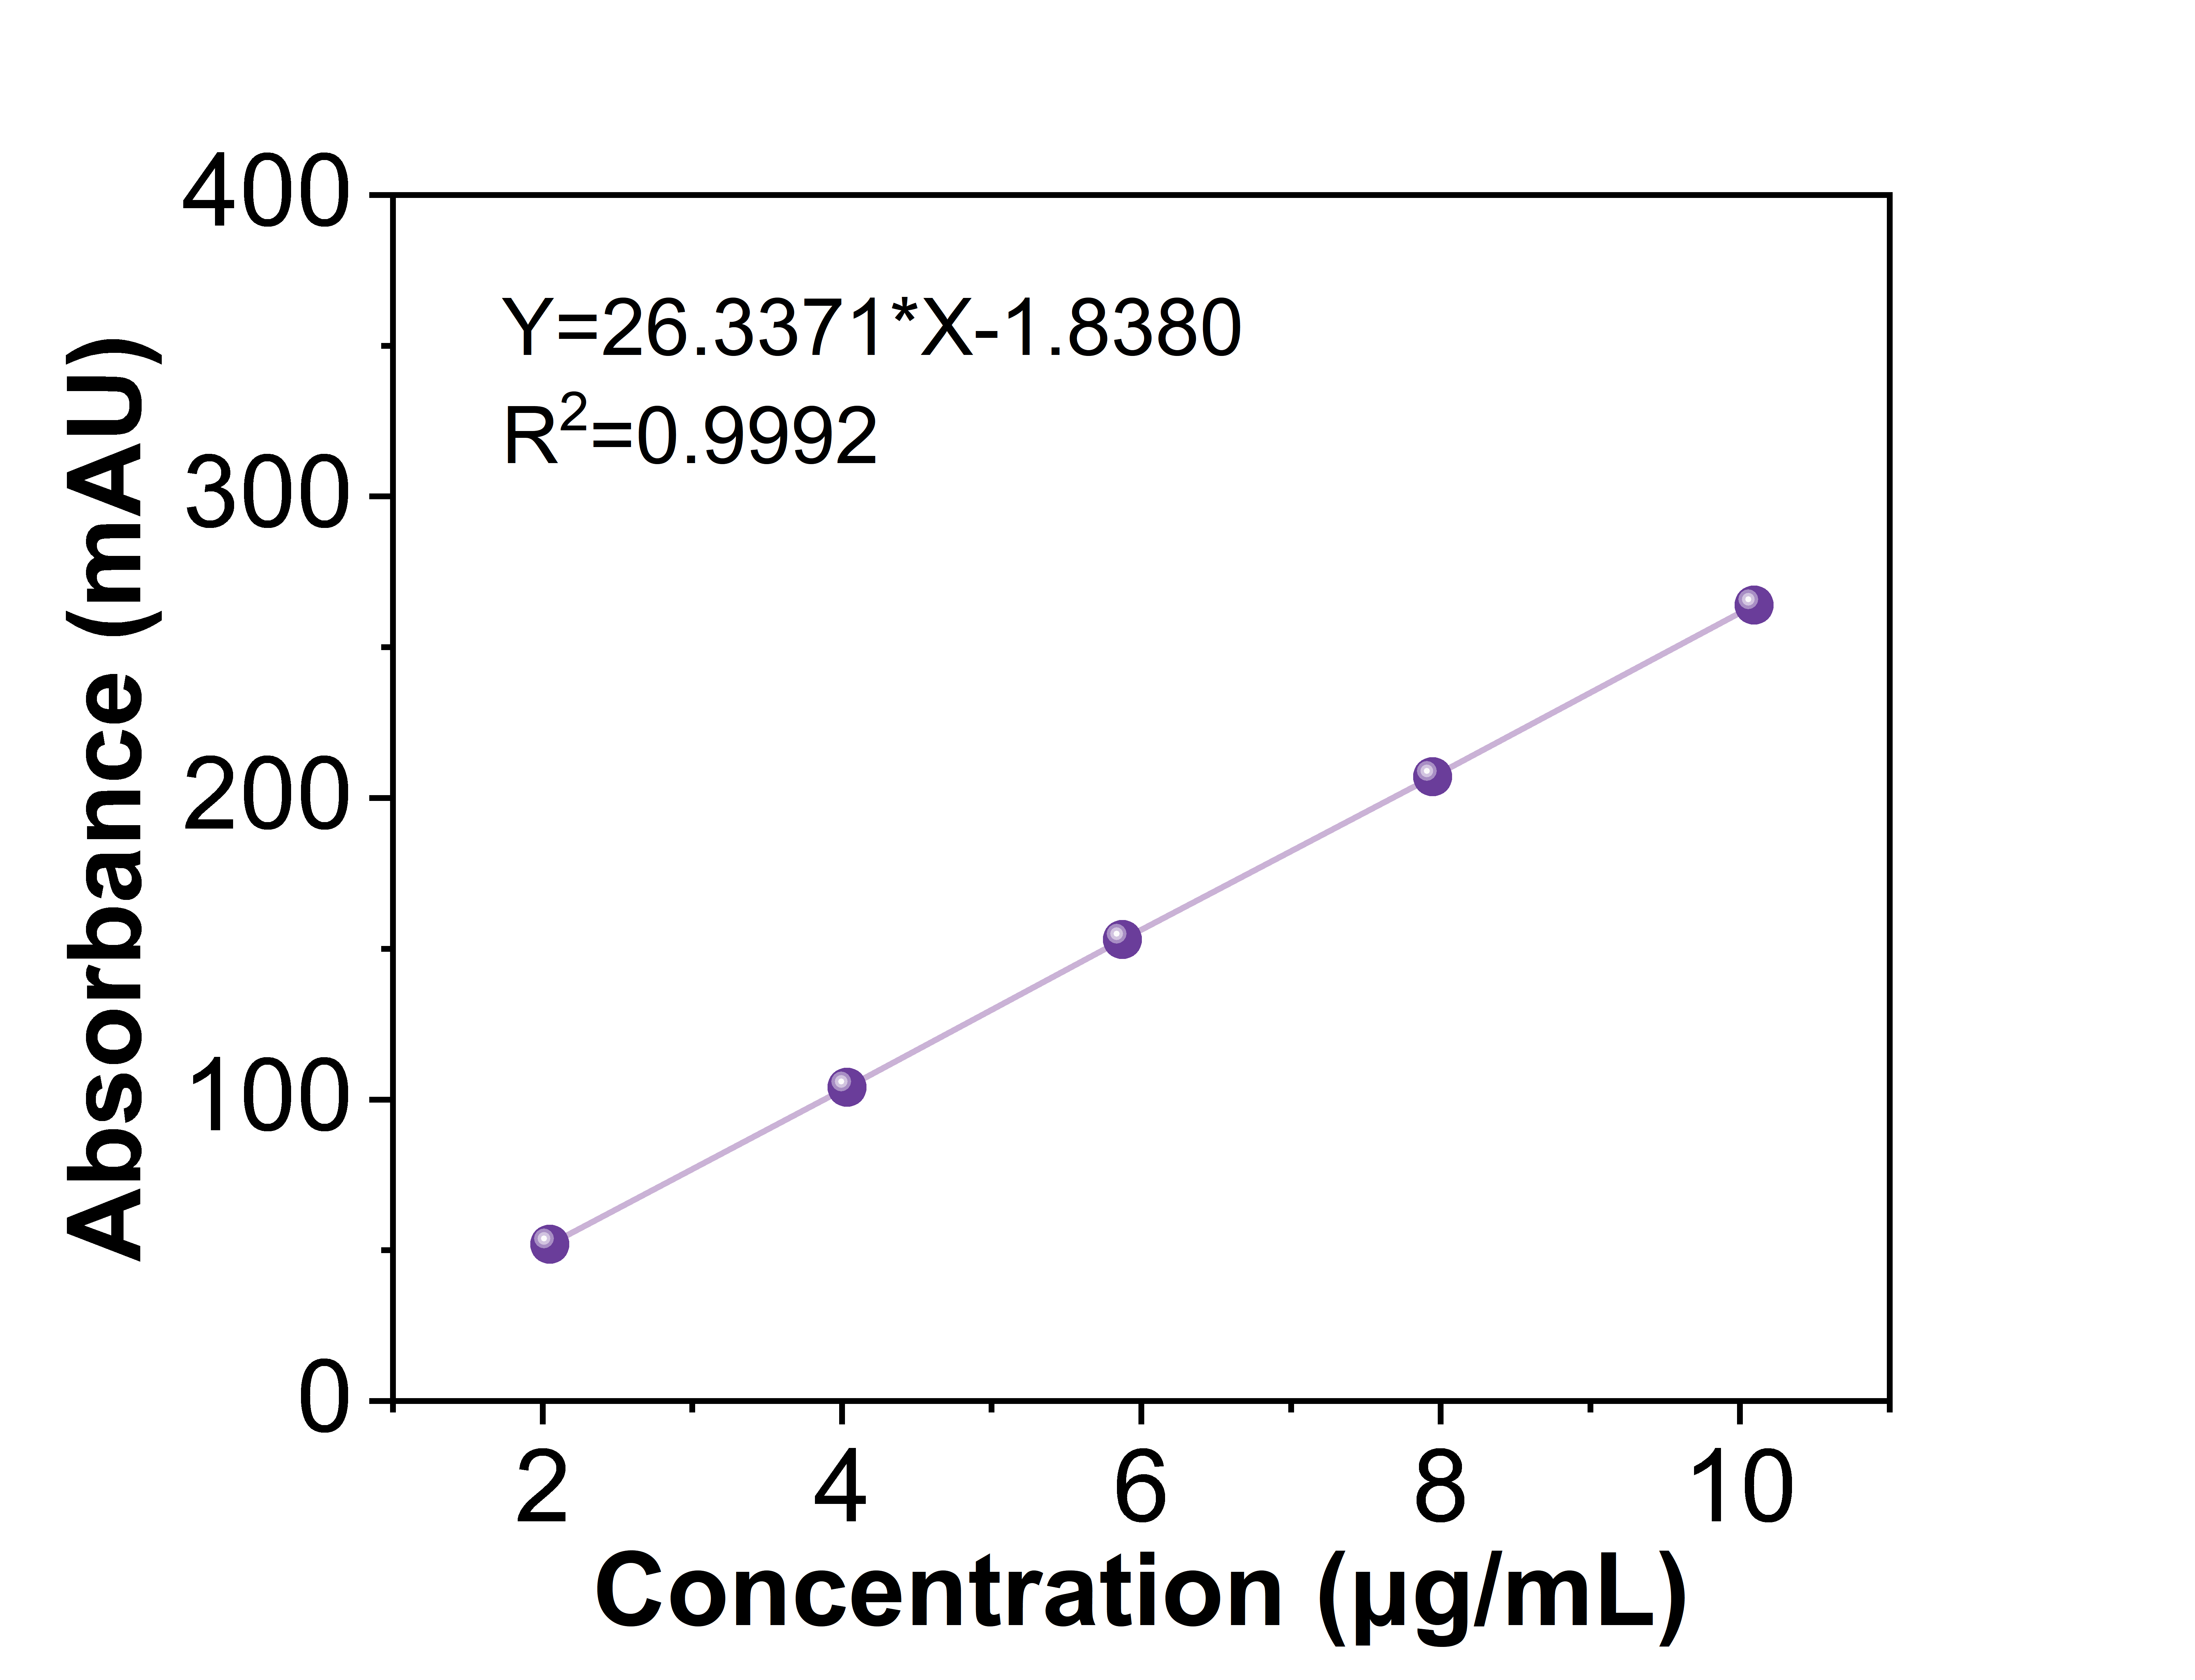


**Figure S7**. HPLC standard curve of BNN6.


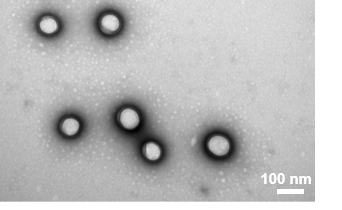

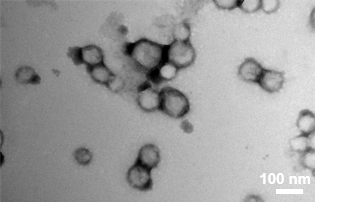


**Figure S8**. TEM images of BP NPs and BP@M. Scale bars: 100 nm.


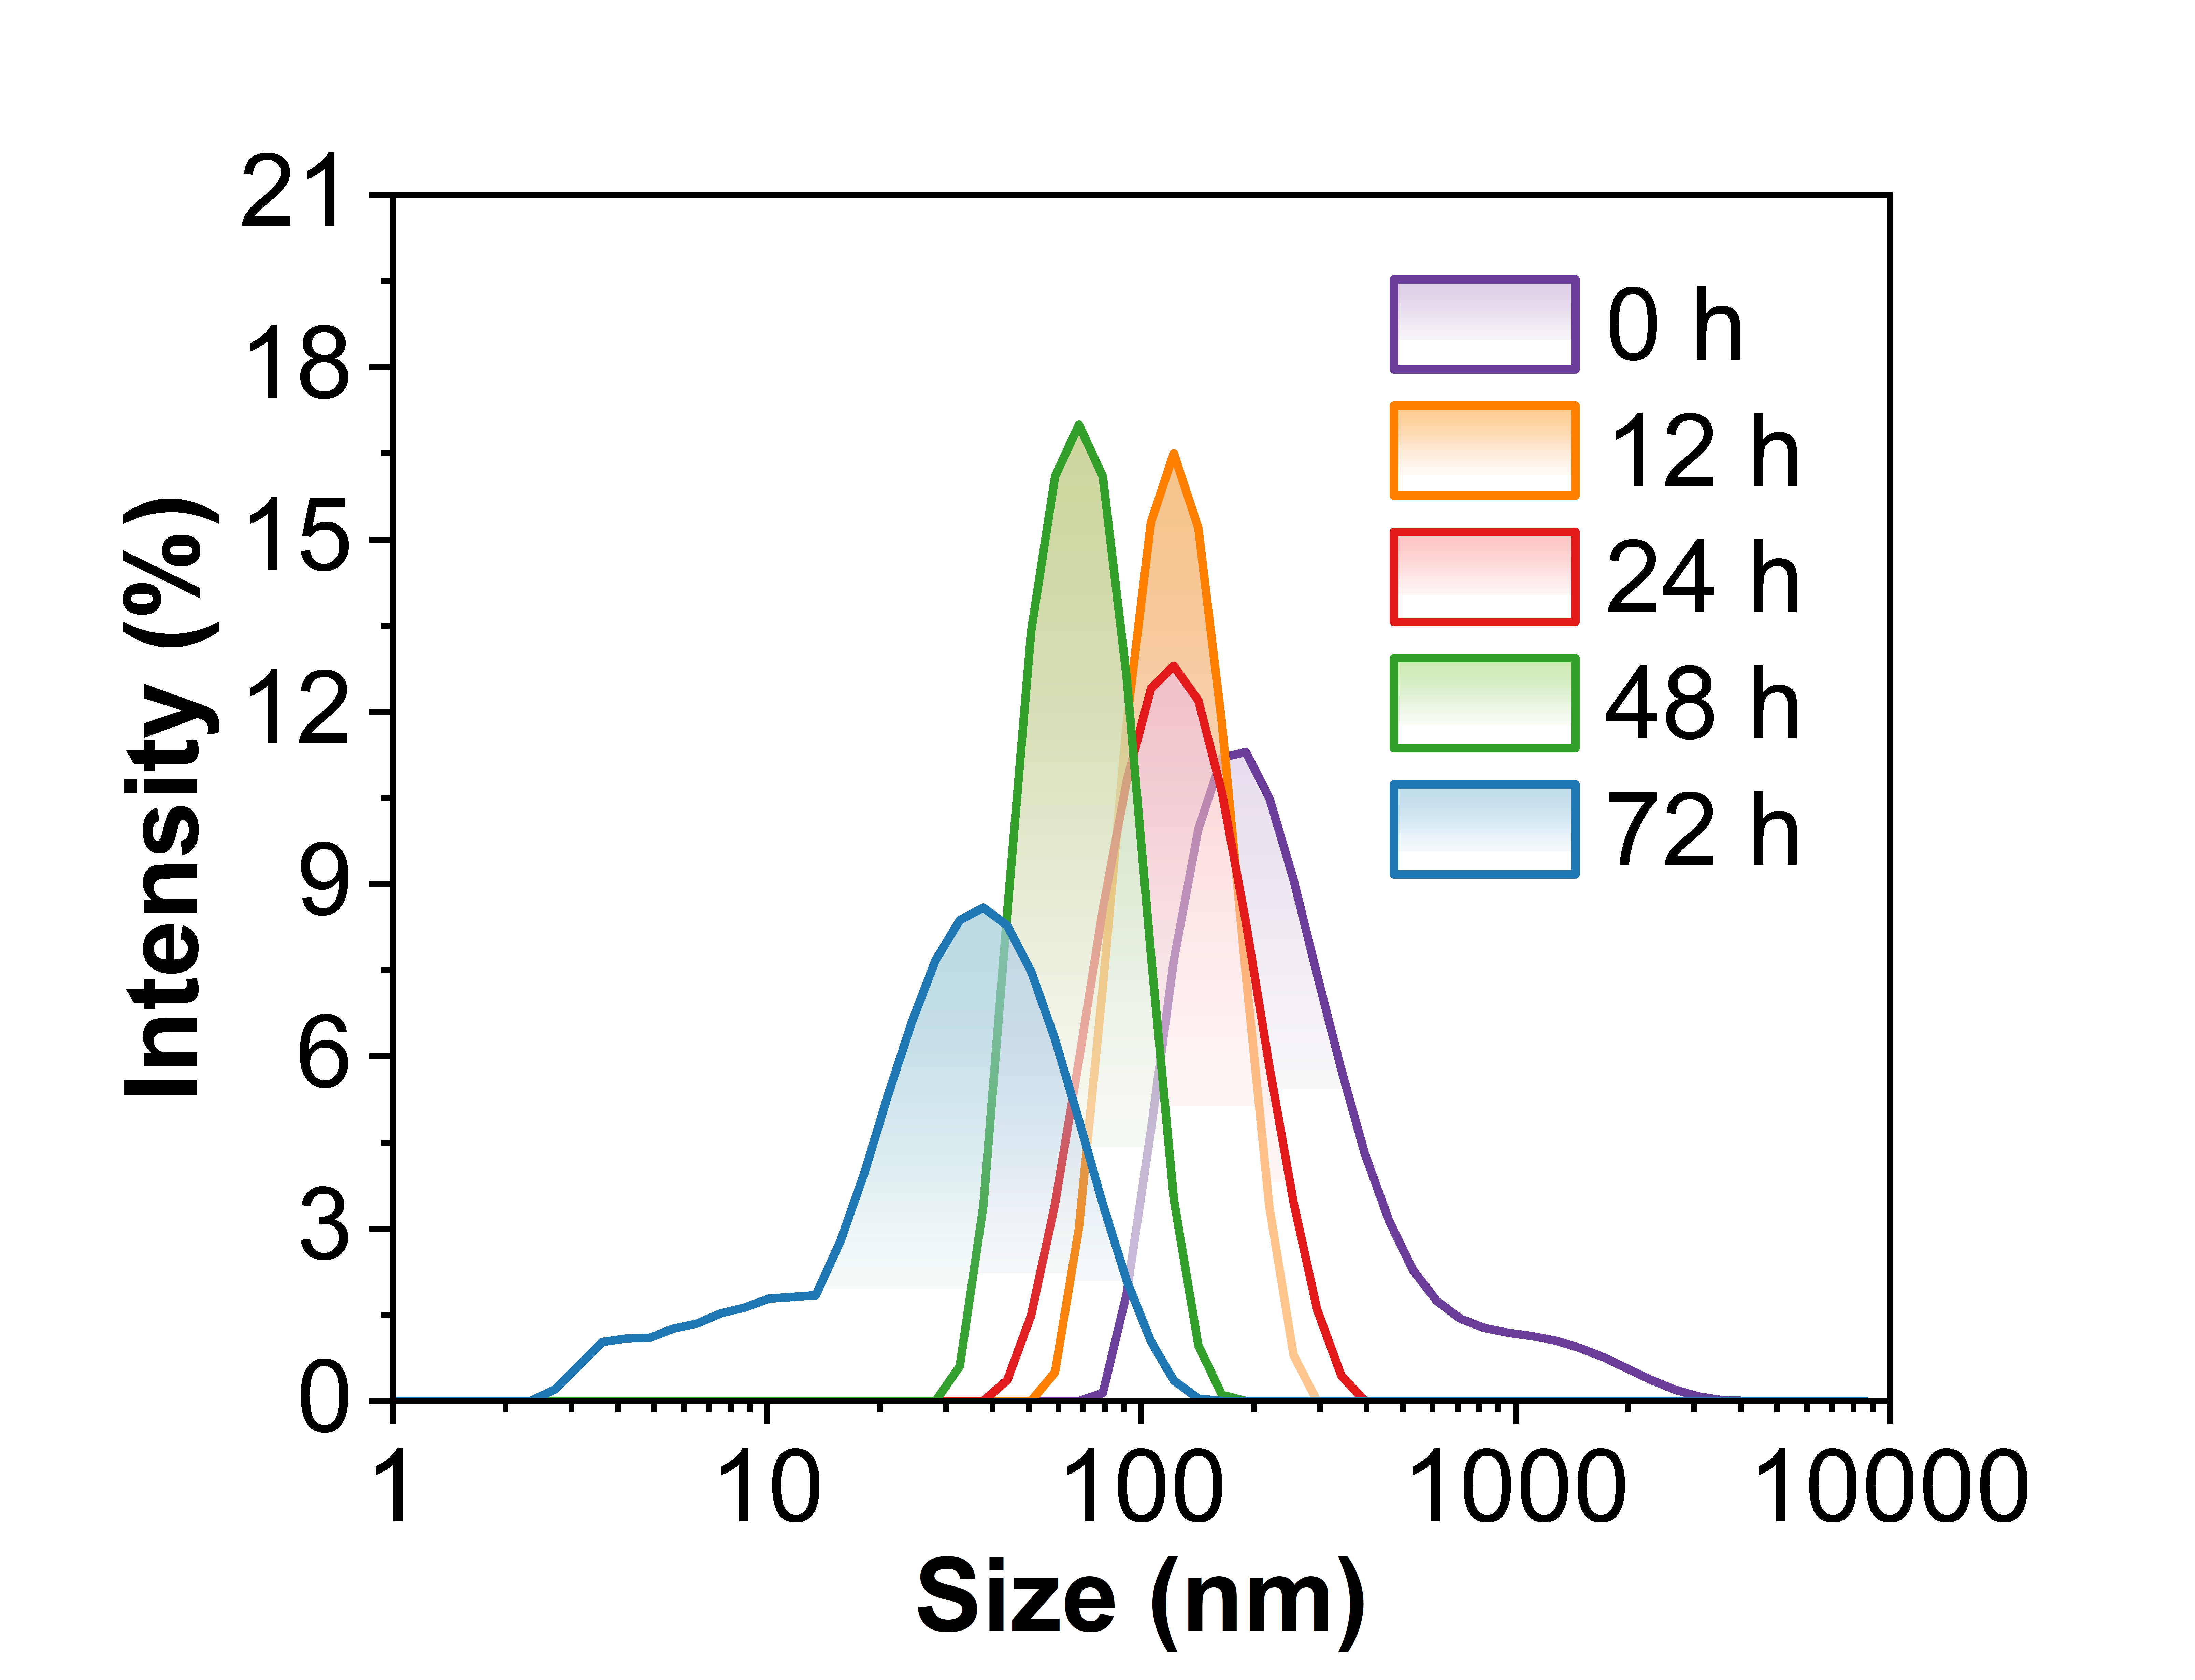


**Figure S9**. The changes of hydrodynamic diameter of BP@M in PBS (pH 5.5) over 72 h.


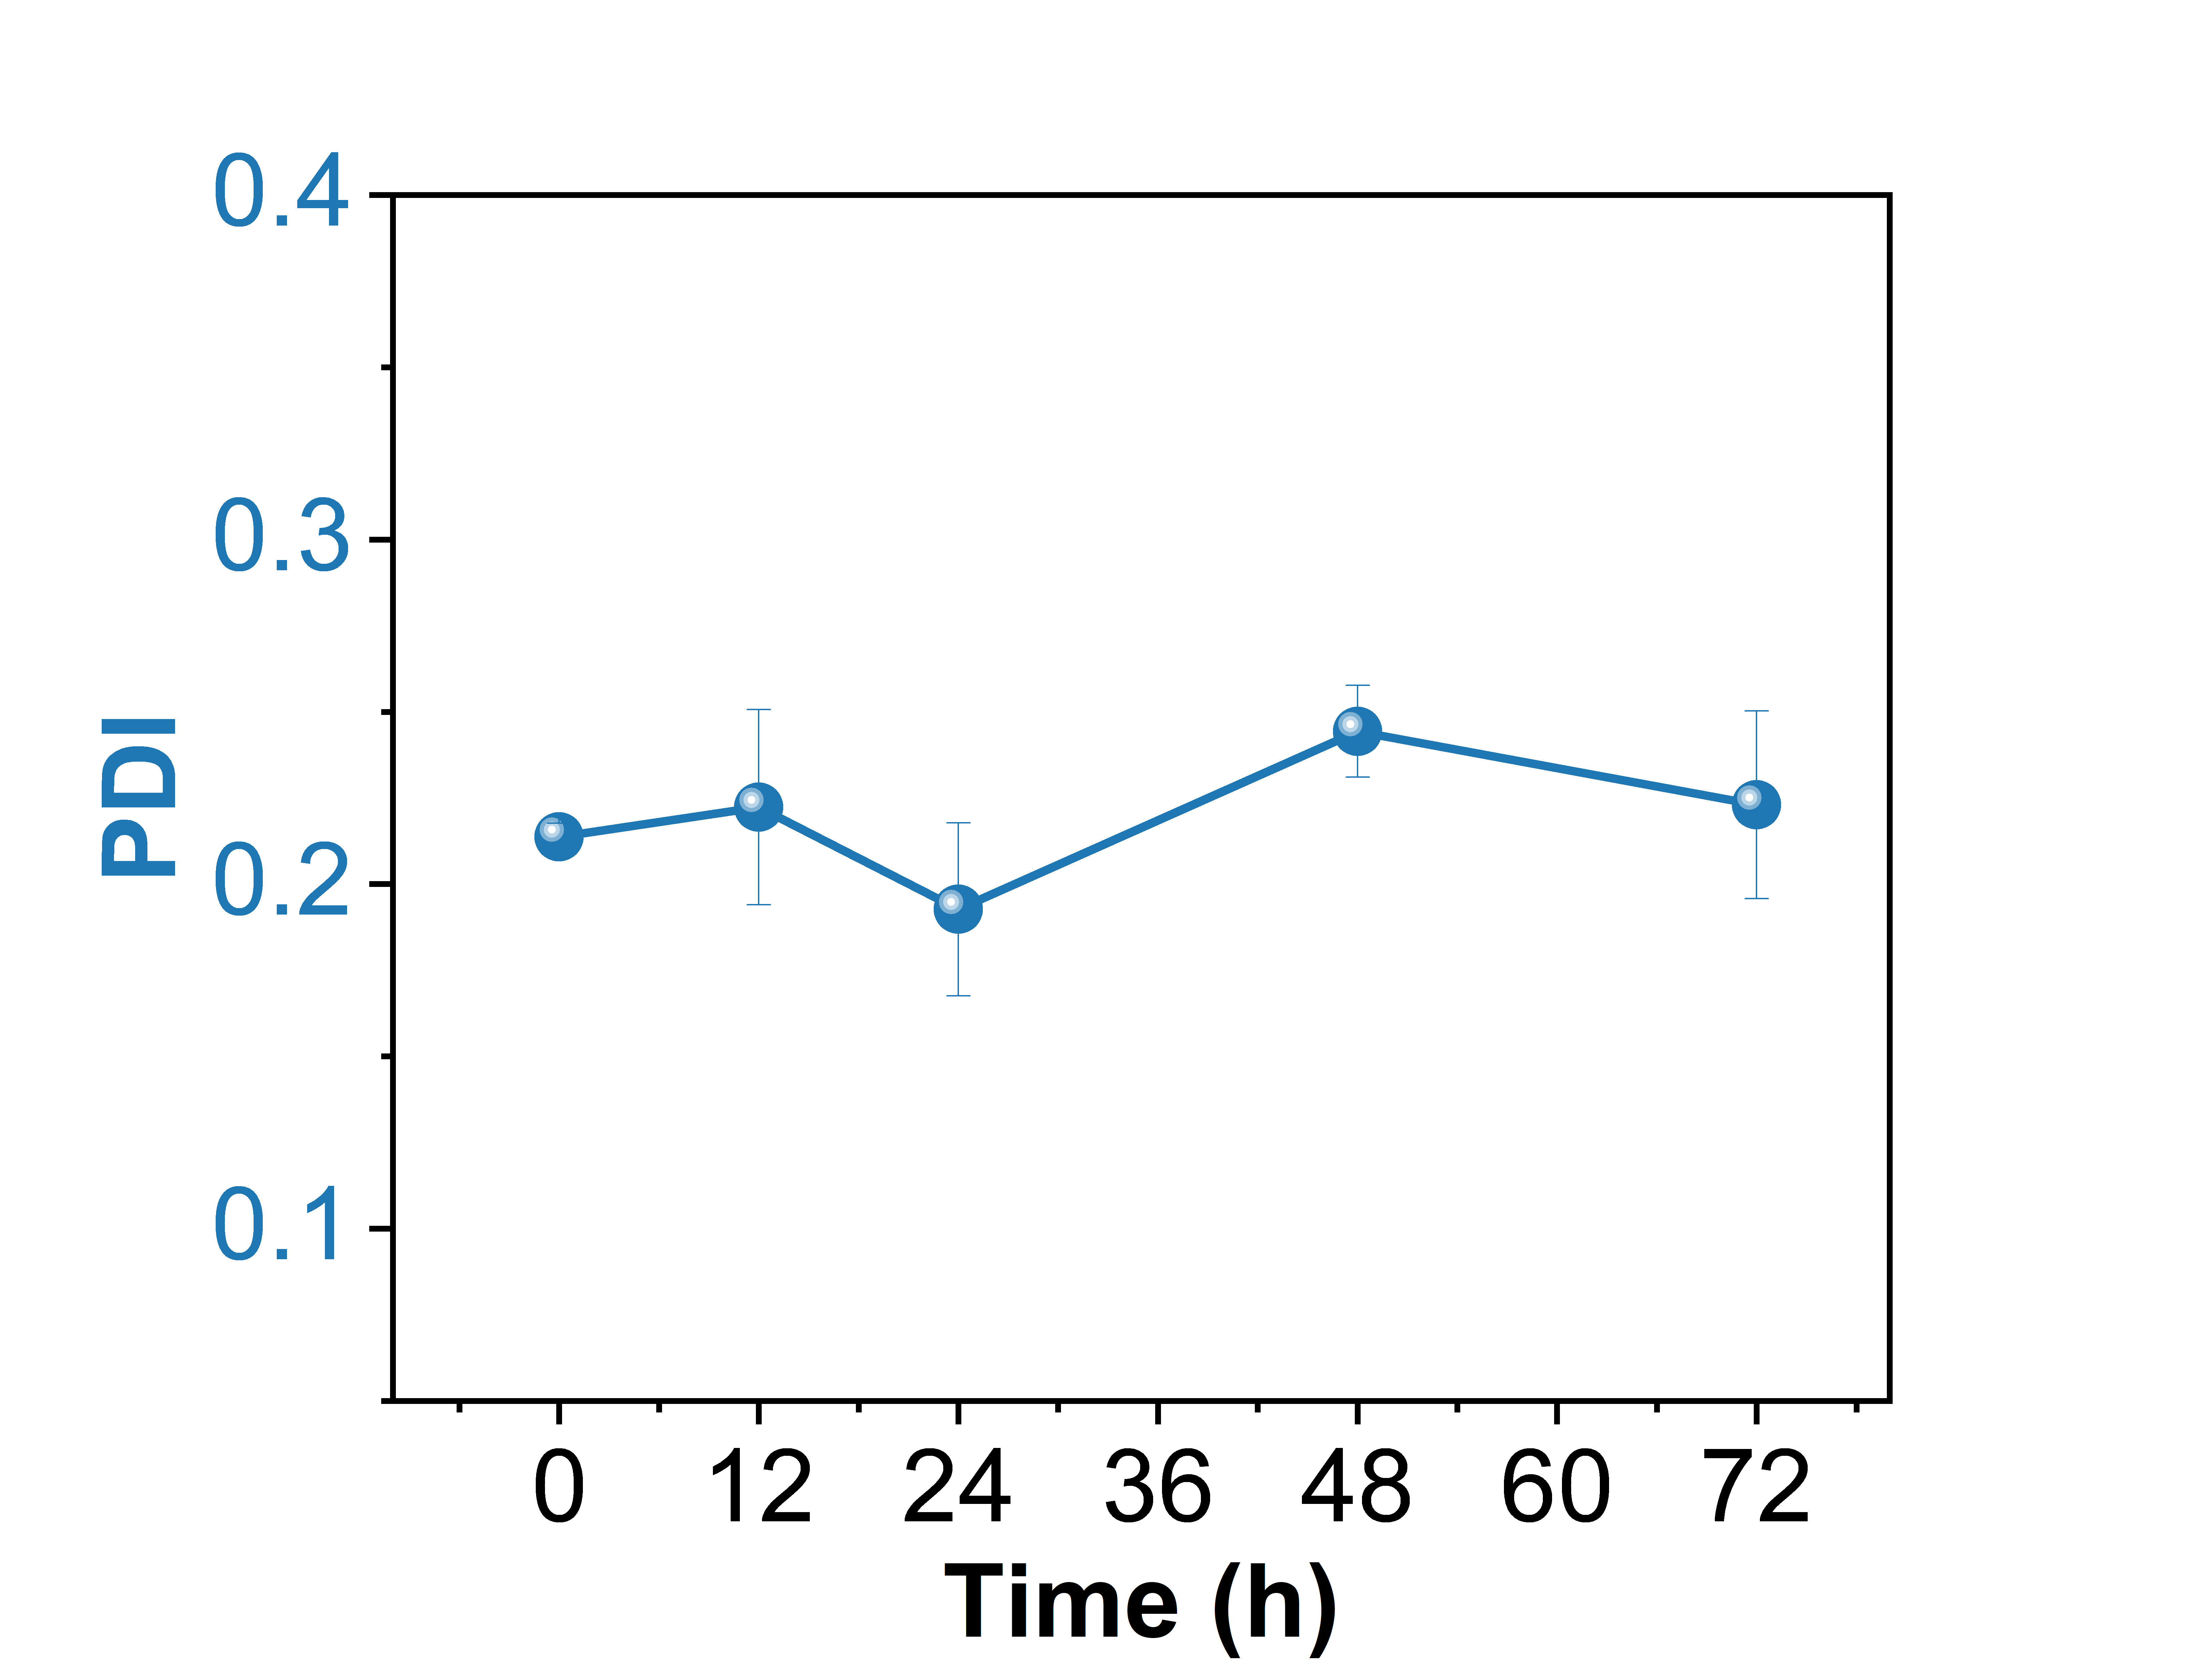


**Figure S10**. 72-hour PDI changes of BP@M in Figure S9.


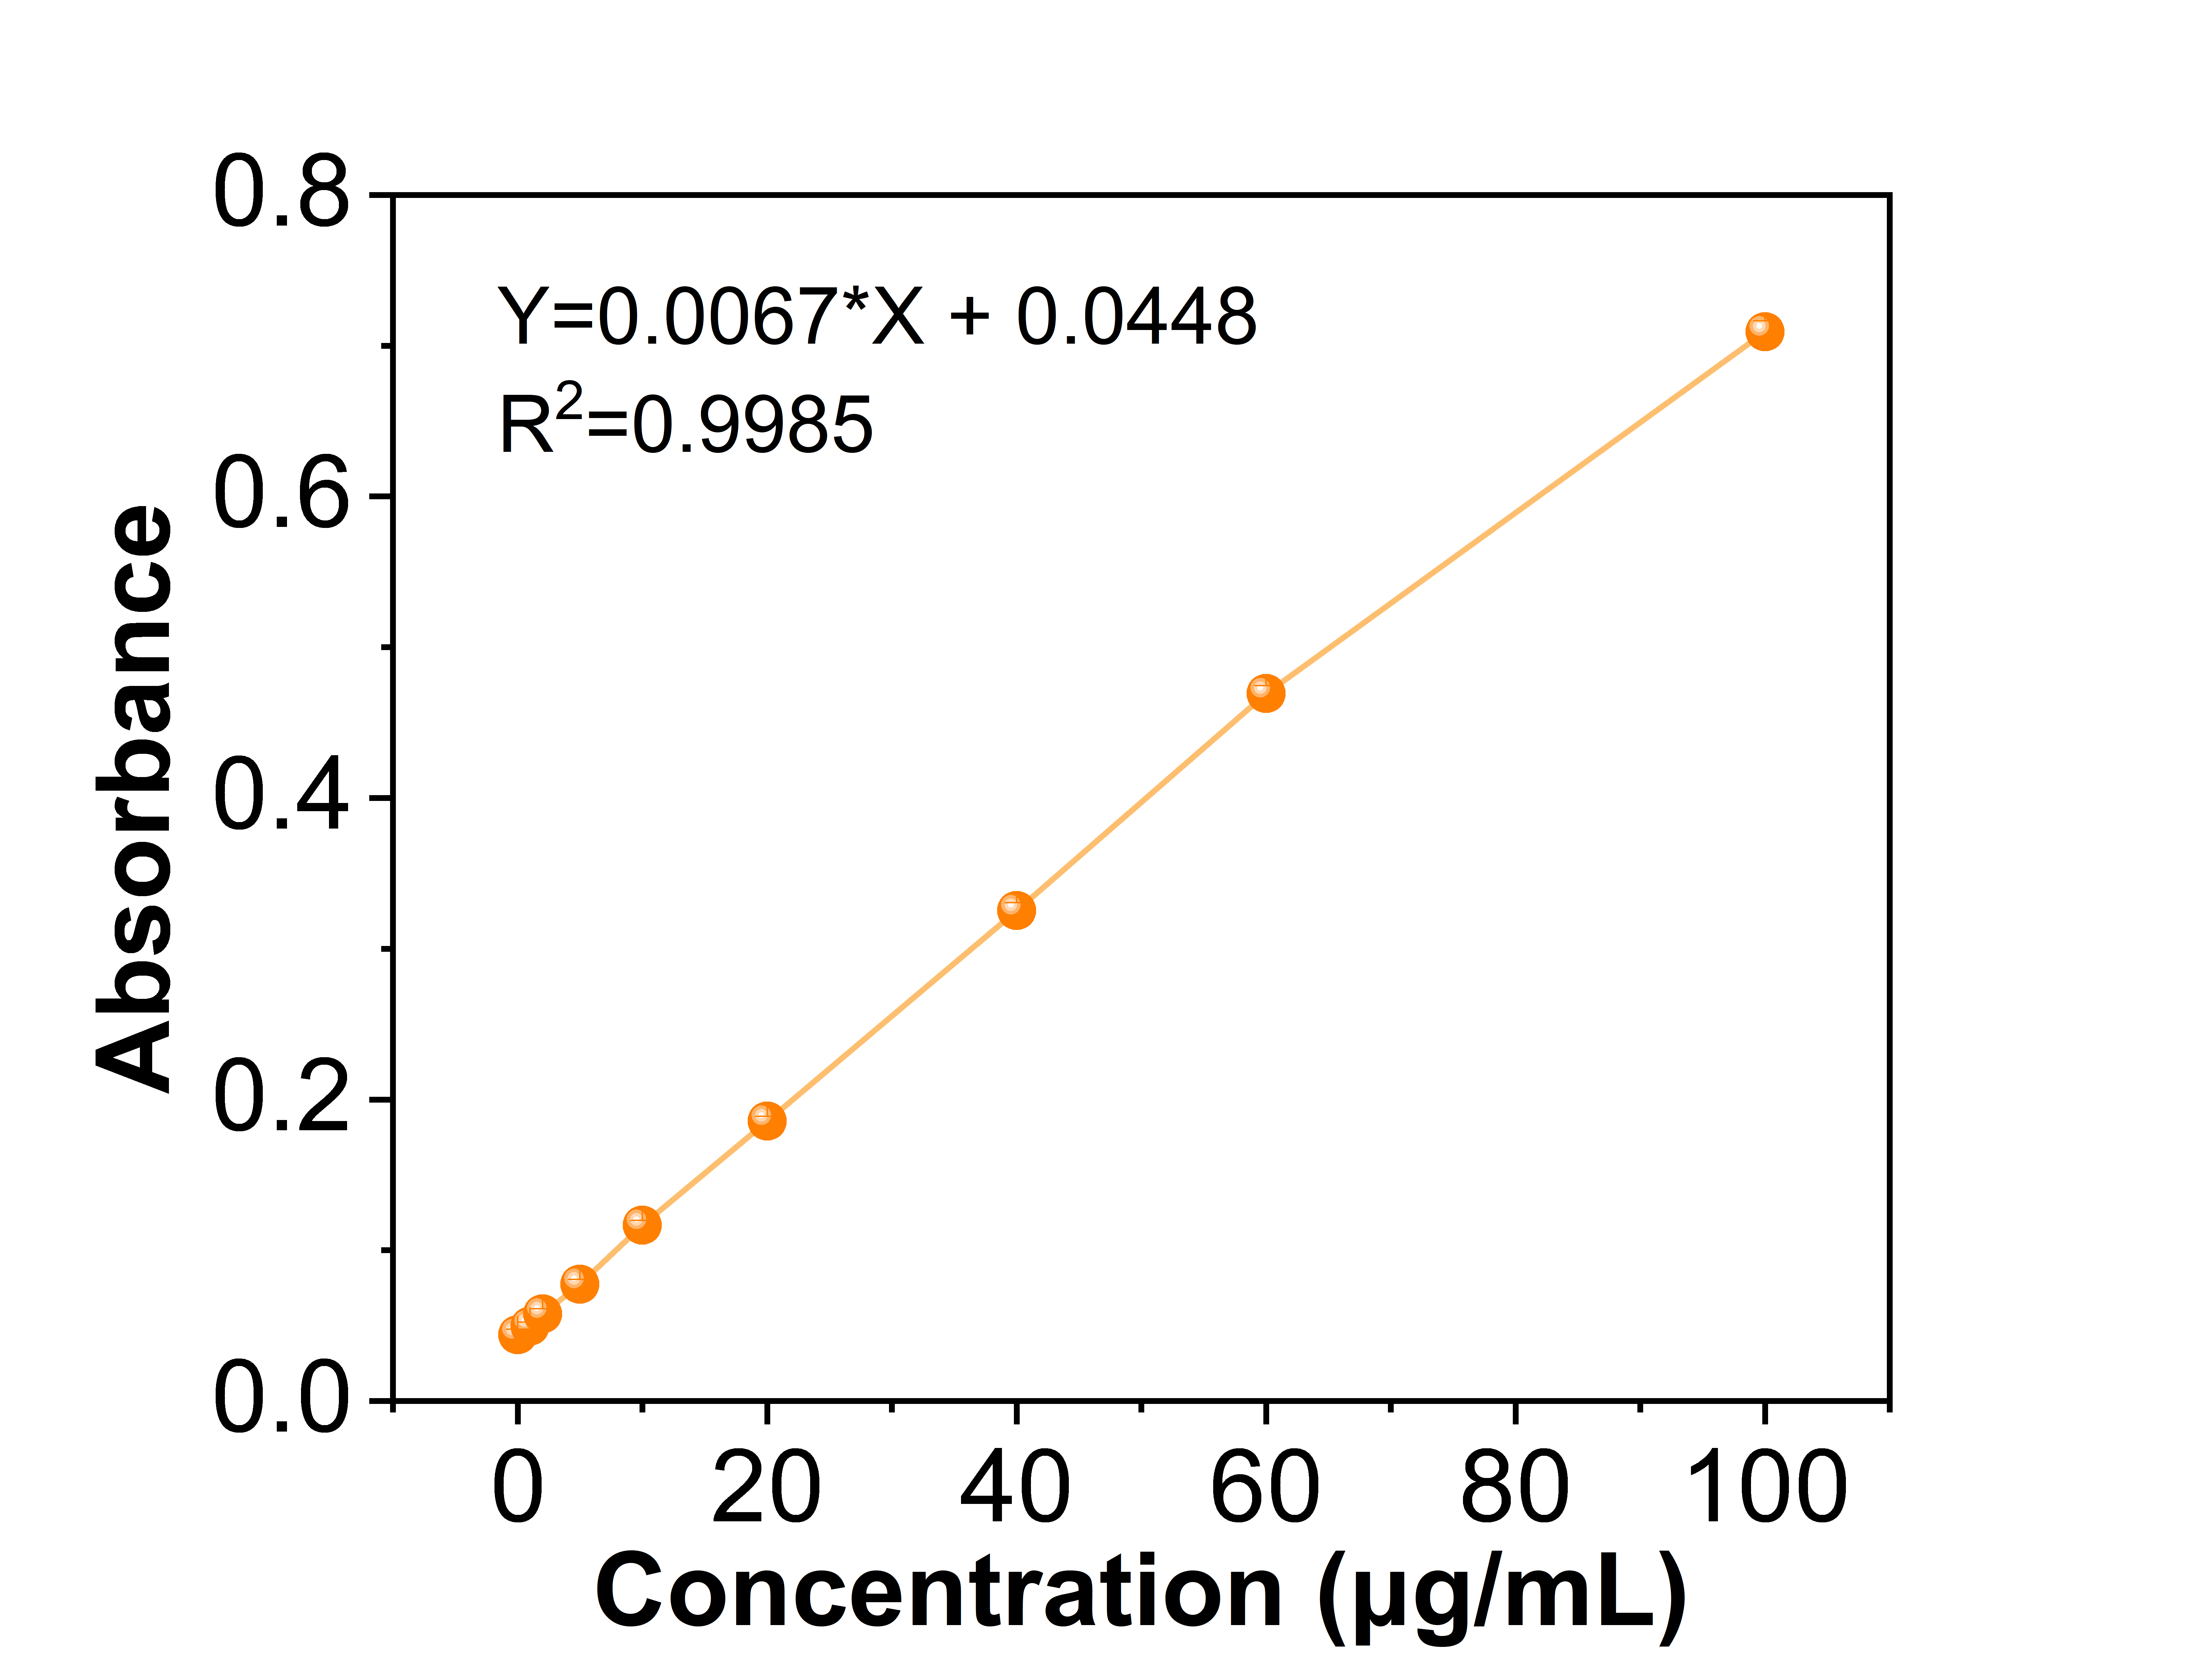


**Figure S11**. The standard curve for NO release.


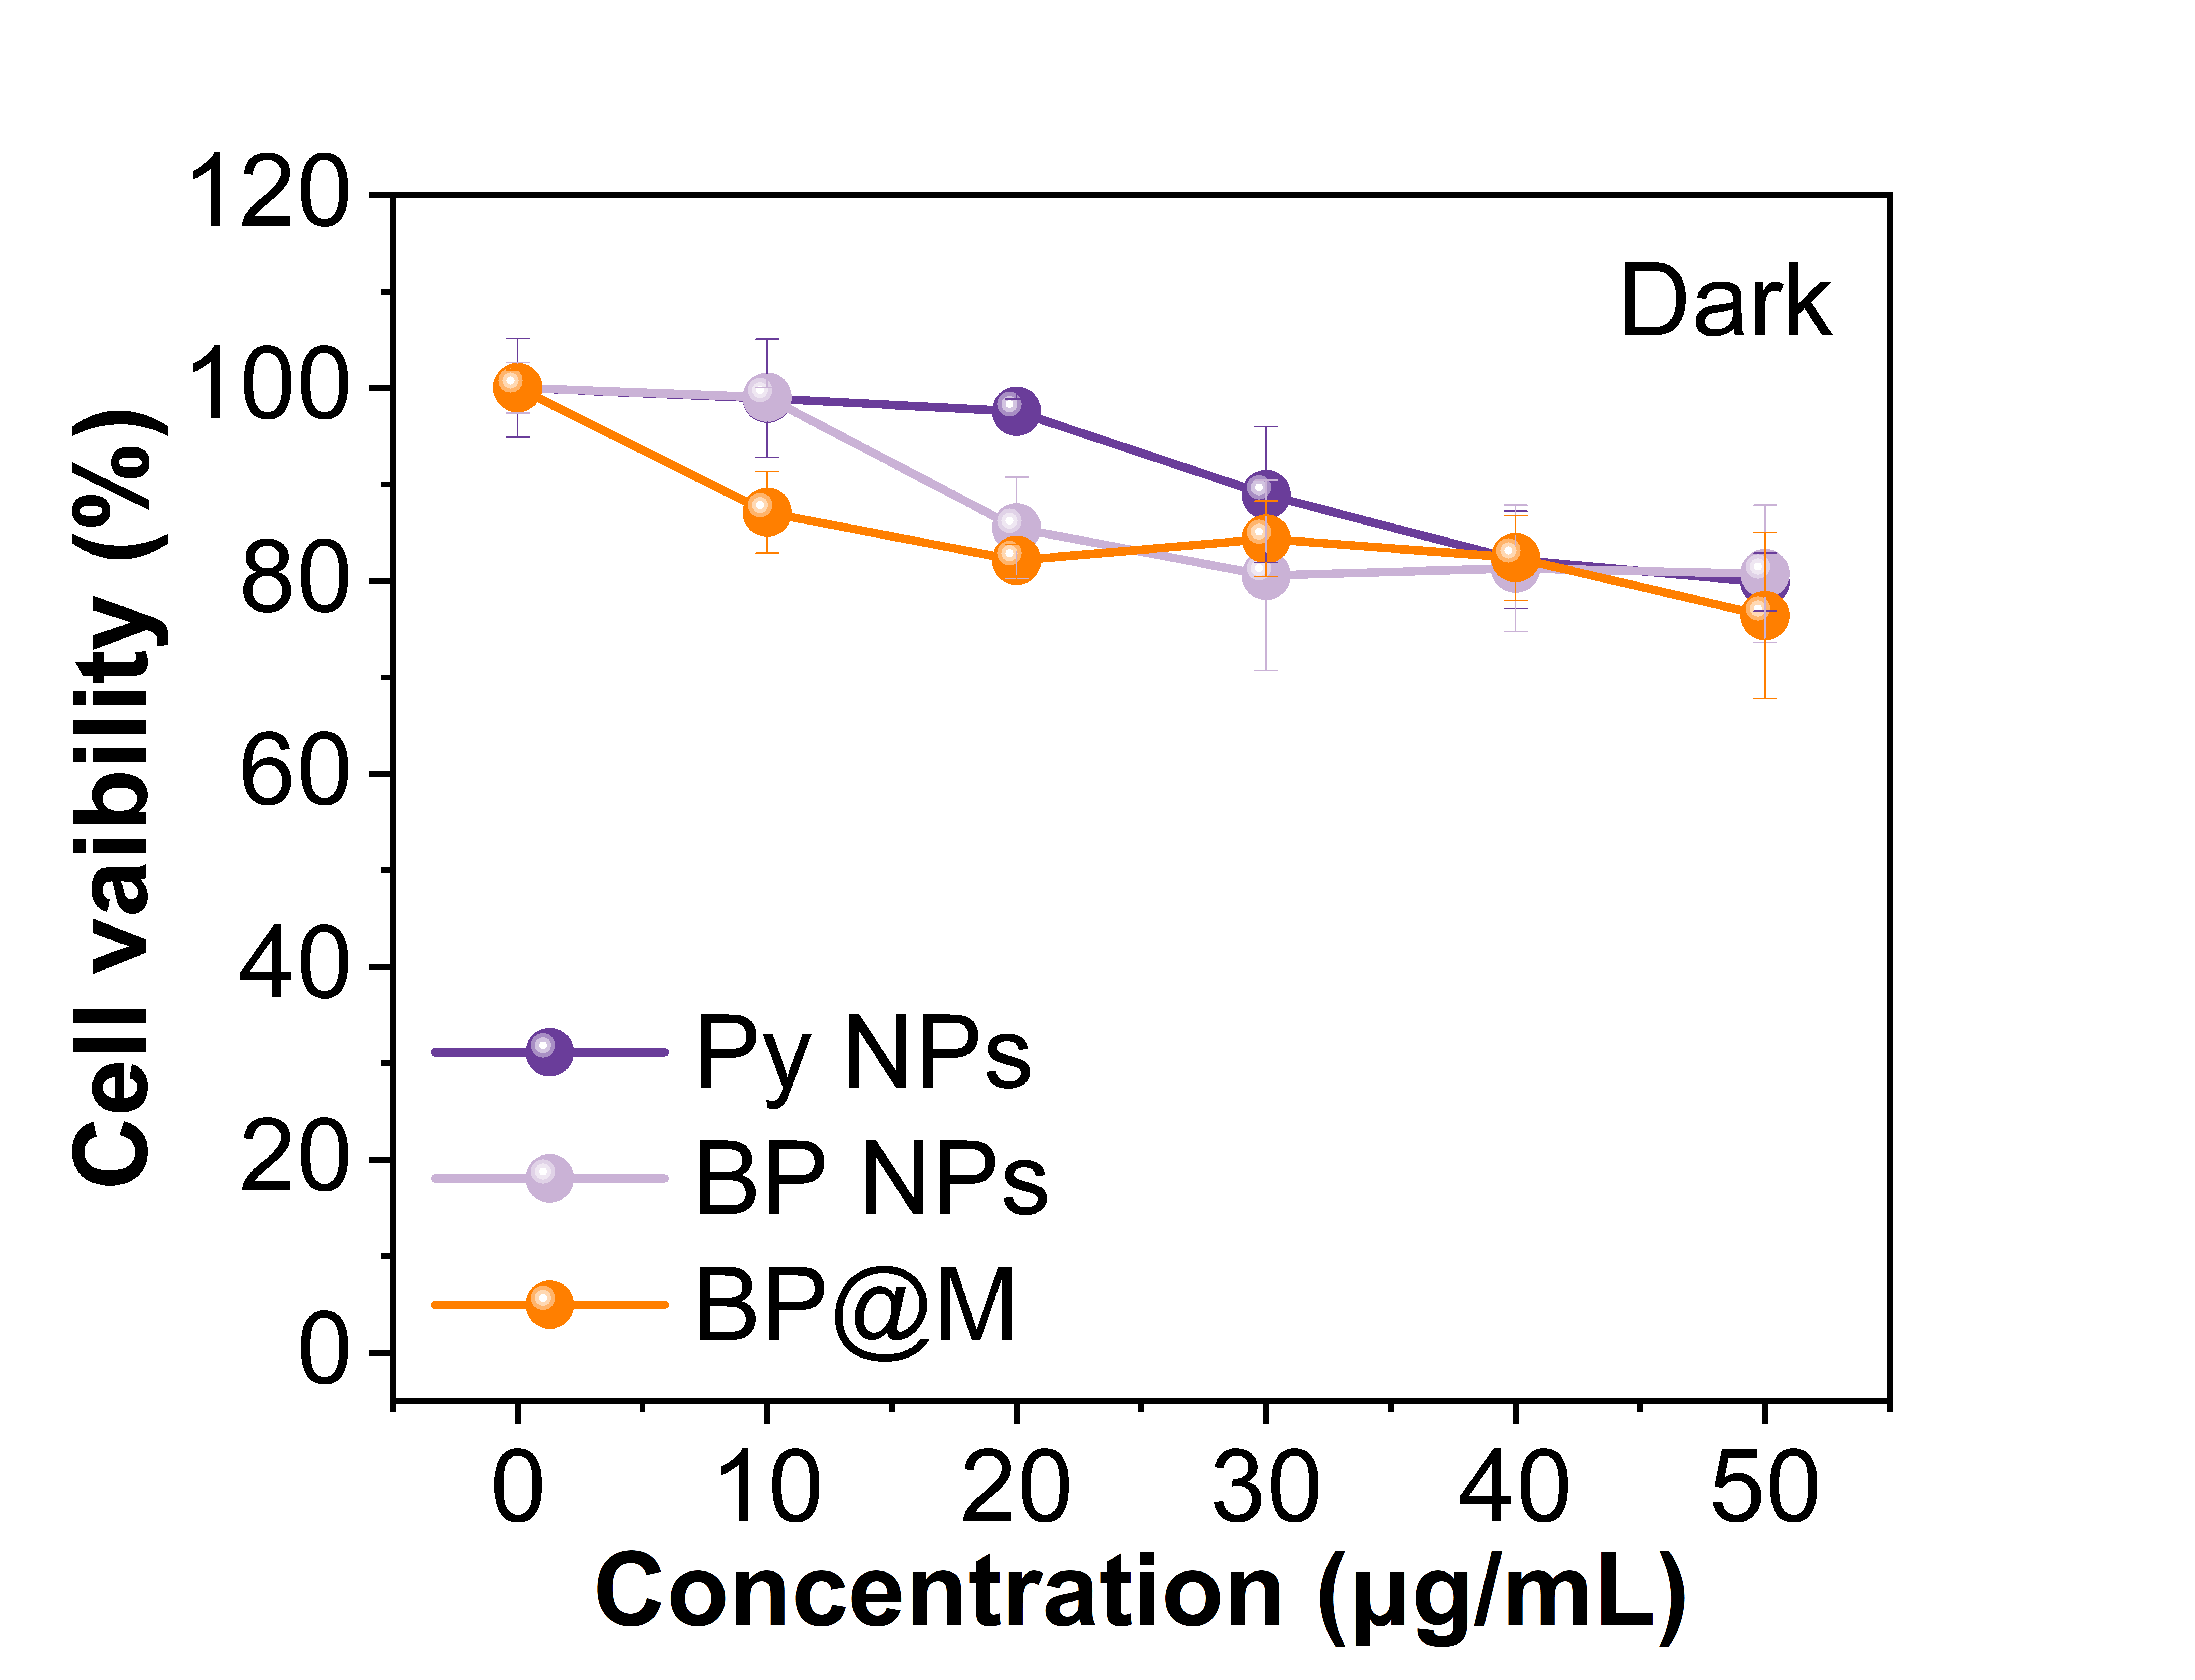


**Figure S12**. CCK-8 assay for measuring viability of PBS, Py NPs, BP NPs or BP@M-treated cells in dark conditions.


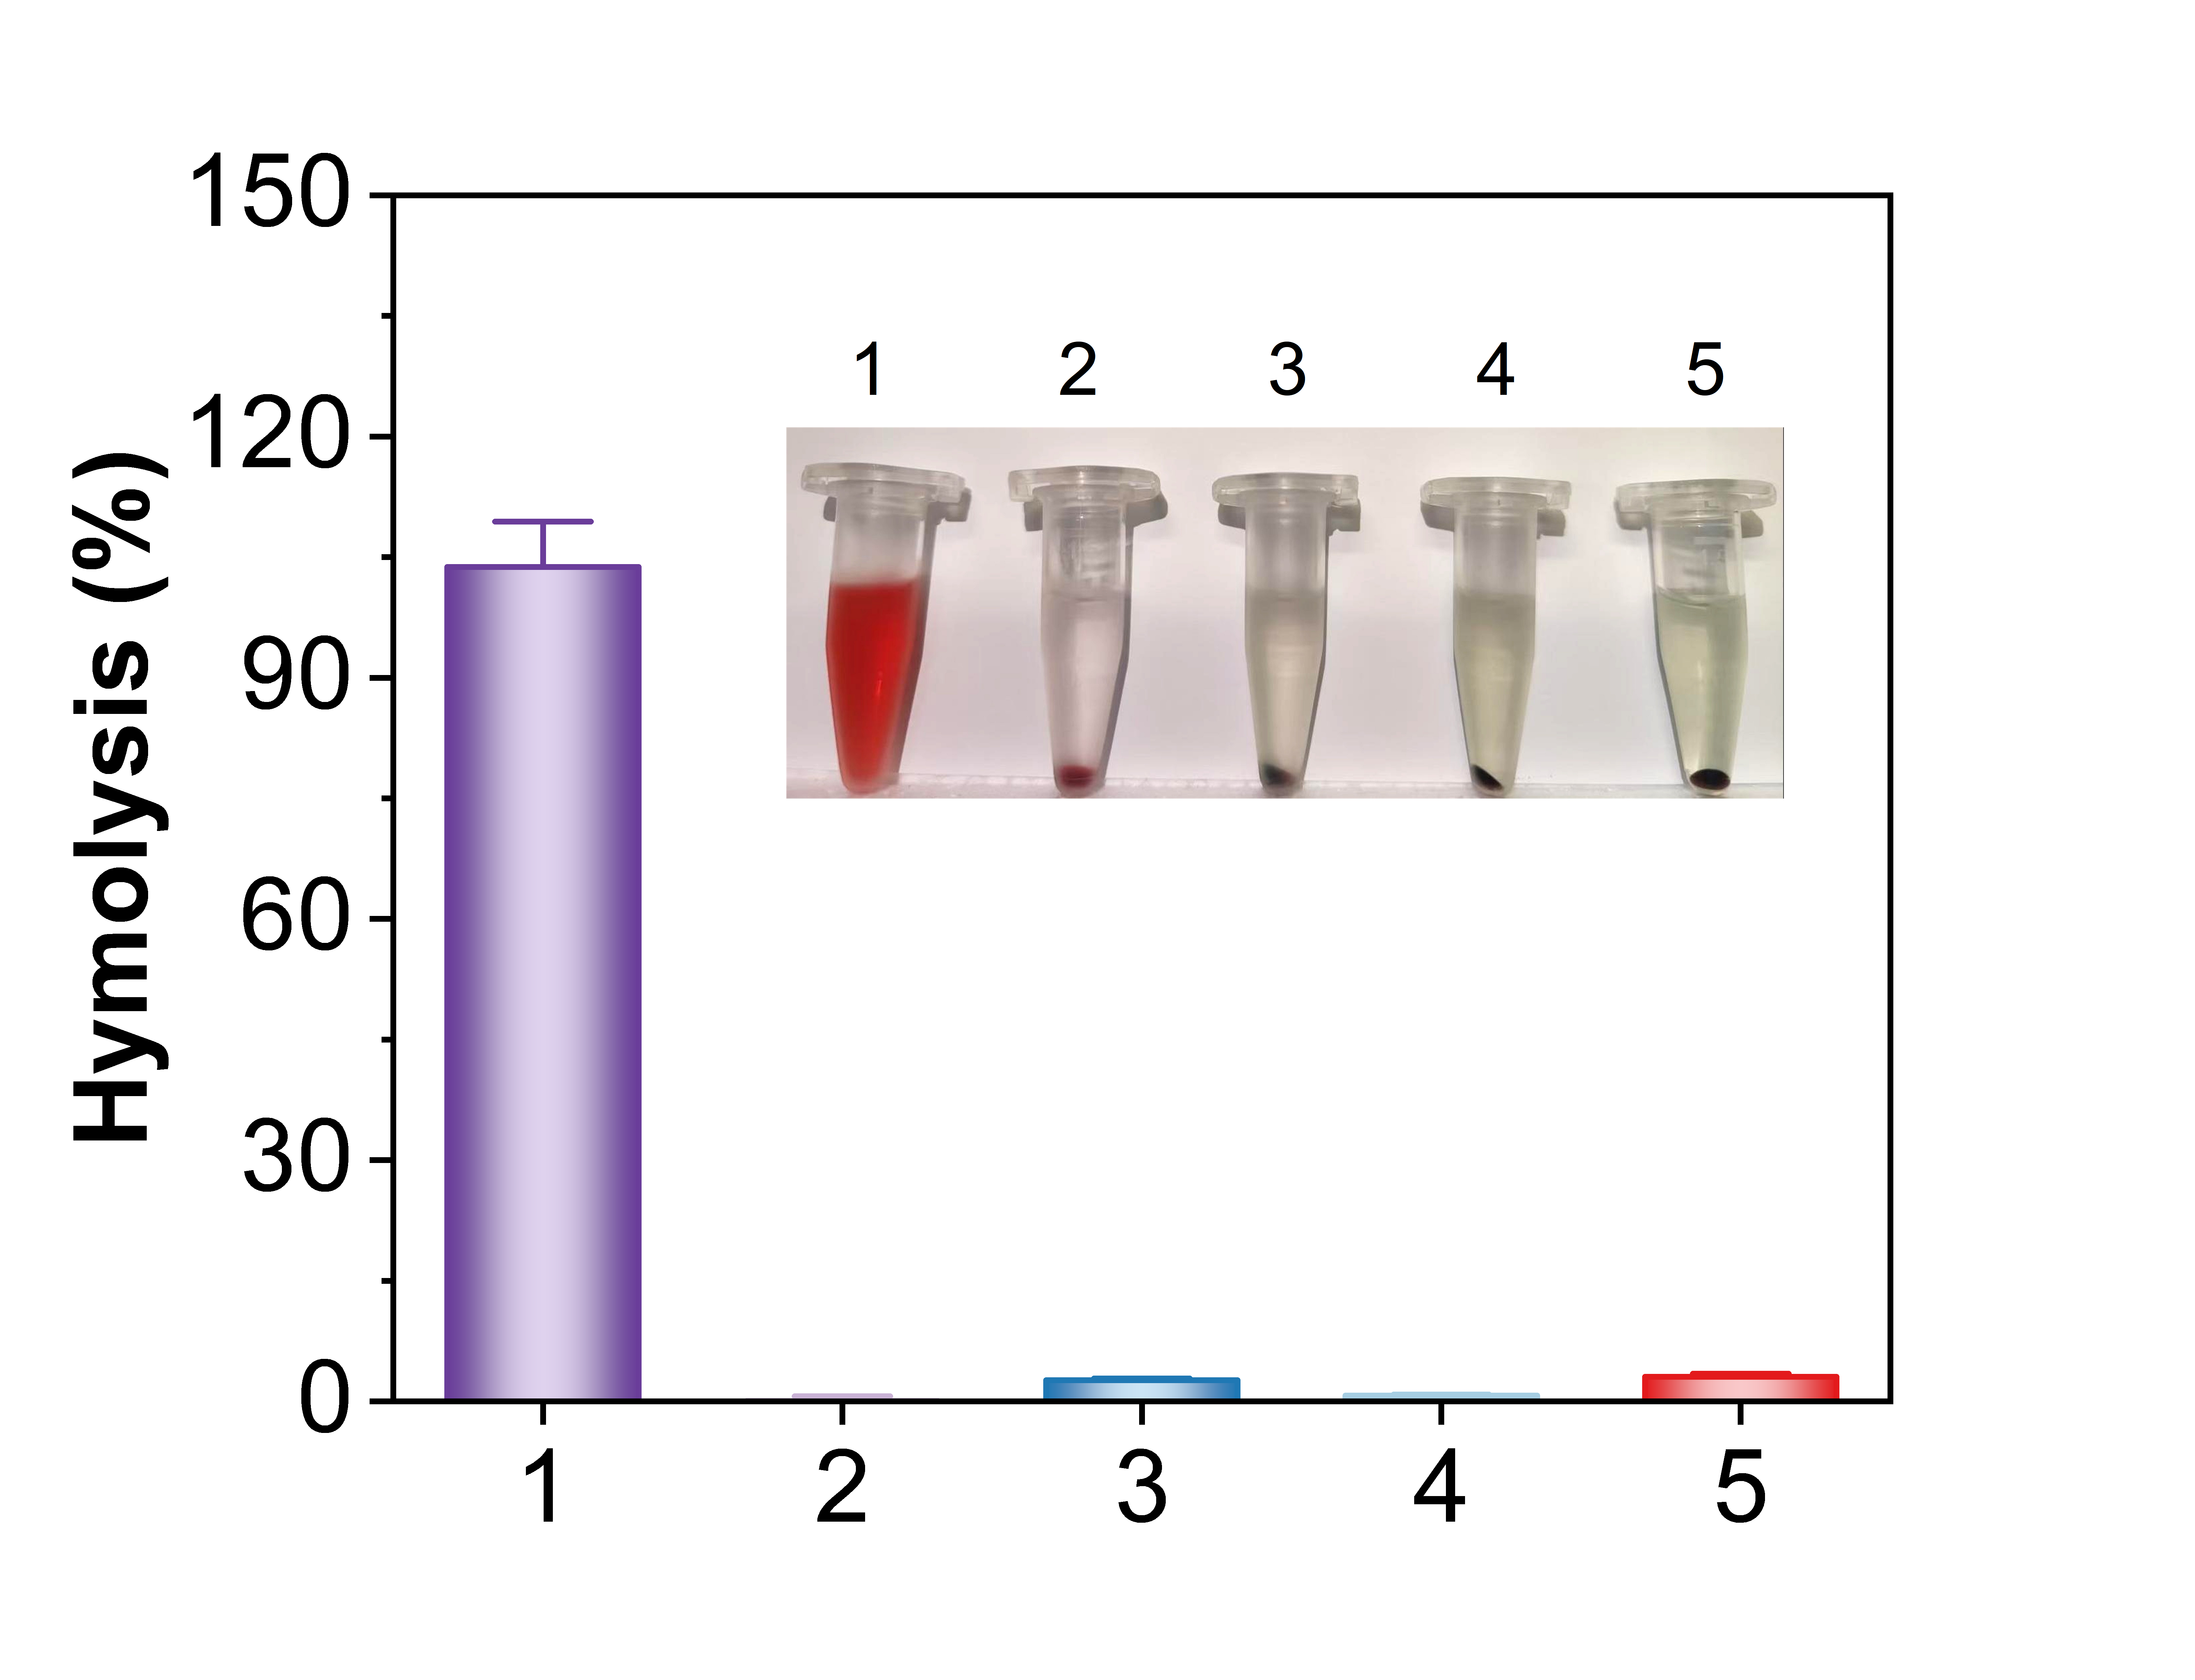


**Figure S13**. Hemolysis results of different groups; 1: 1% Triton-X-100; 2: PBS; 3: Py NPs; 4: BP NPs; 5: BP@M.


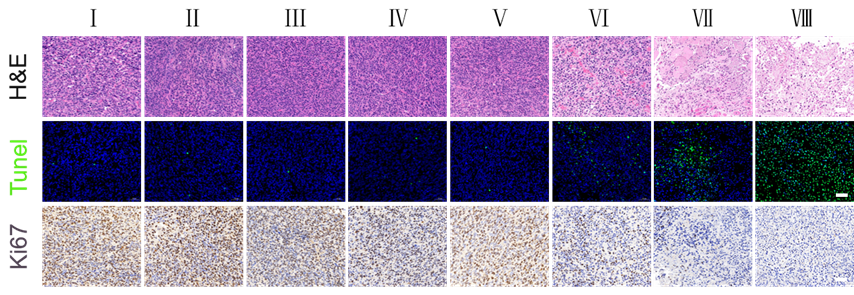
**Figure S14**. H&E staining, Ki67 assay, TUNEL immunofluorescence staining of tumor tissues after different treatments. Scale bars: 50 μm.


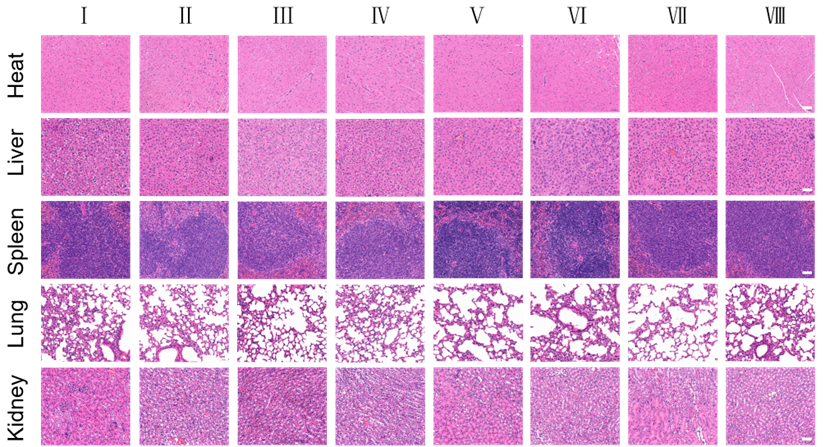


**Figure S15**. H&E staining of major organs of mice after different treatments. Scale bars: 50 μm.


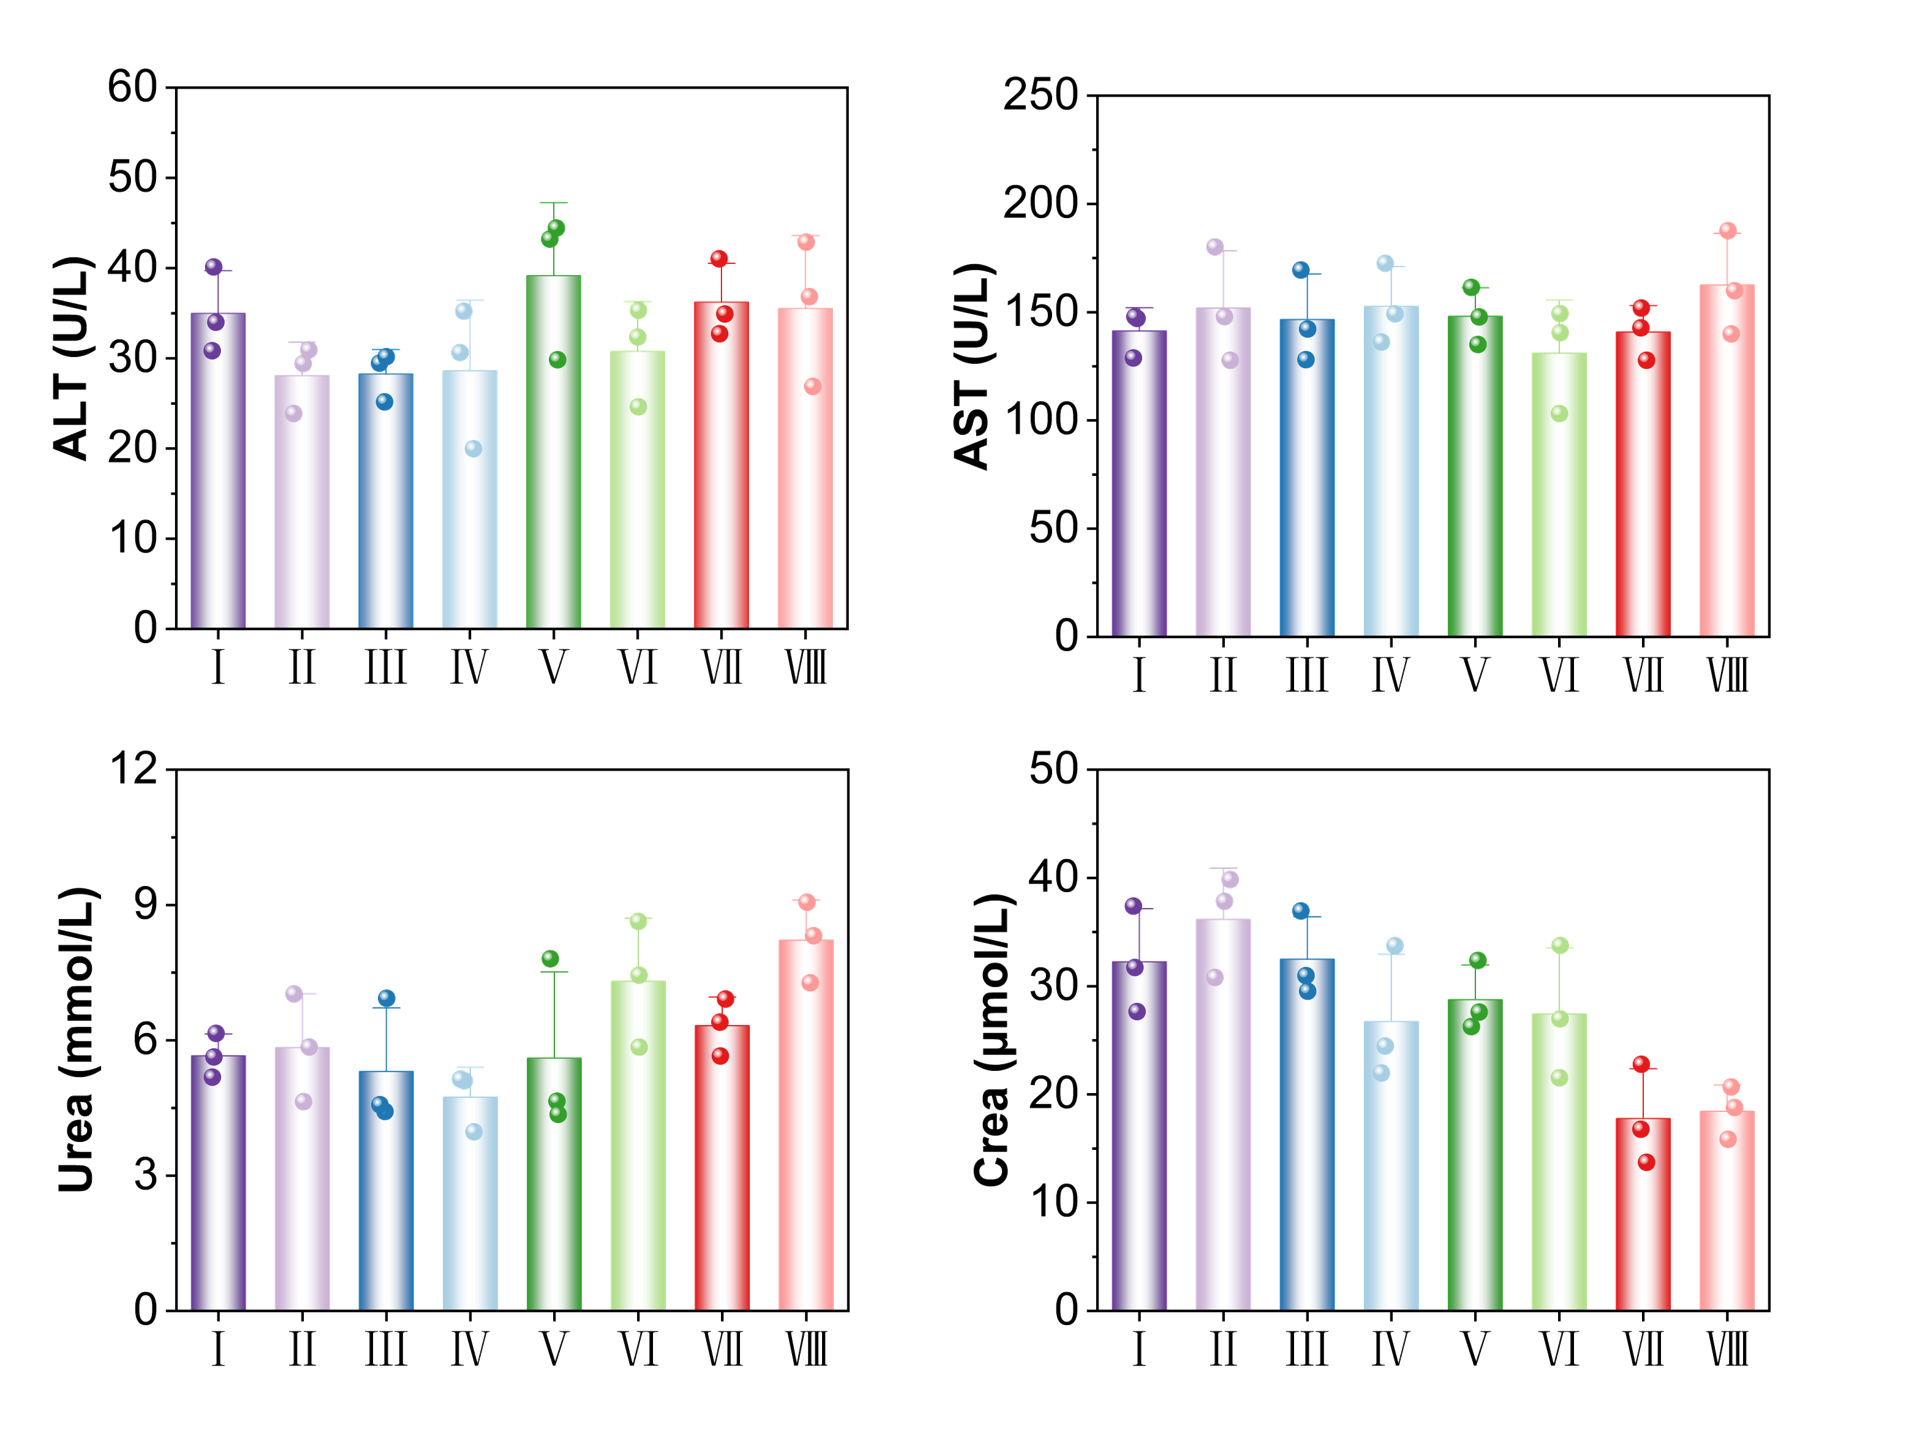


**Figure S16**. Biochemical indices of liver and kidney function in mice after different treatments (n = 3).
