# Supplementary material
Source: Research Square preprint supplement (doi:10.21203/rs.3.rs-9660011/v1)
Supplement: Supplementary file 2 [file f14b30f3f66cd88224b323fc.docx]

**
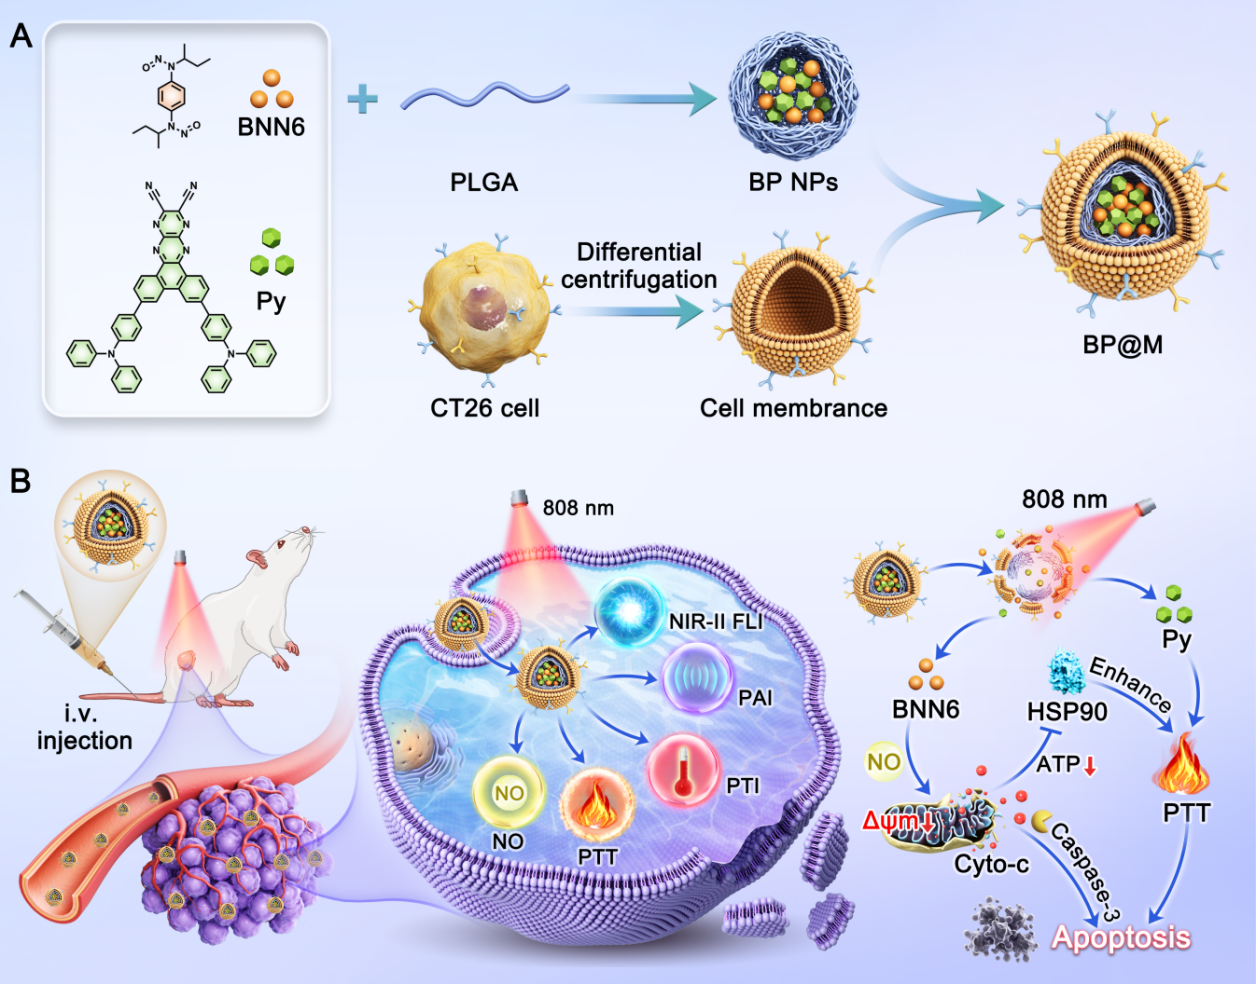
**

**Scheme 1. Schematic illustration of multimodal imaging-guided AIE/NO biomimetic nano-controlled release for enhanced photothermal therapy.** (A) Preparation of BP@M biomimetic nanosystem (B) The mechanism of BP@M in synergistic mPTT/NO antitumor theranostics.
